## RESEARCH ARTICLE

# Understanding the factors related to how East and Southeast Asian immigrant youth and families access mental health and substance use services: A scoping review

Chloe Gao<sup>1\*</sup>, Lianne L. Cho<sup>2,3</sup>, Avneet Dhillon<sup>4</sup>, Soyeon Kim<sup>5,6</sup>, Kimberlyn McGrail<sup>7</sup>, Michael R. Law<sup>7</sup>, Nadiya Sunderji<sup>8</sup>, Skye Barbic<sup>4</sup>

**1** Department of Medicine, University of British Columbia, Vancouver, British Columbia, Canada, **2** Department of Psychiatry, University of British Columbia, Vancouver, British Columbia, Canada, **3** BC Mental Health and Substance Use Services Research Institute, Vancouver, British Columbia, Canada, **4** Department of Occupational Science and Occupational Therapy, University of British Columbia, Vancouver, British Columbia, Canada, **5** Department of Psychiatry, McMaster University, Hamilton, Canada, **6** Waypoint Research Institute, Waypoint Centre for Mental Healthcare, Penetanguishene, Canada, **7** School of Population and Public Health, University of British Columbia, Vancouver, British Columbia, Canada, **8** Department of Psychiatry, Faculty of Medicine, University of Toronto, Toronto, Ontario, Canada

\* [gaoc1234@student.ubc.ca](mailto:gaoc1234@student.ubc.ca)

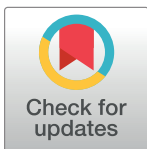

## OPEN ACCESS

**Citation:** Gao C, Cho LL, Dhillon A, Kim S, McGrail K, Law MR, et al. (2024) Understanding the factors related to how East and Southeast Asian immigrant youth and families access mental health and substance use services: A scoping review. PLoS ONE 19(7): e0304907. <https://doi.org/10.1371/journal.pone.0304907>

**Editor:** AKM Alamgir, Access Alliance Multicultural Health and Community Services: Access Alliance, CANADA

**Received:** November 6, 2023

**Accepted:** May 20, 2024

**Published:** July 15, 2024

**Copyright:** © 2024 Gao et al. This is an open access article distributed under the terms of the [Creative Commons Attribution License](https://creativecommons.org/licenses/by/4.0/), which permits unrestricted use, distribution, and reproduction in any medium, provided the original author and source are credited.

**Data Availability Statement:** All relevant data are within the manuscript and its [Supporting information](#) files.

**Funding:** The author(s) received no specific funding for this work.

**Competing interests:** The authors have declared that no competing interests exist.

## Abstract

The objective of the review is to identify factors related to how East and Southeast Asian immigrant youth aged 12–24 and their families access mental health and substance use (MHSU) services. To address how East and Southeast Asian youth and their families access mental health and substance use services, a scoping review was conducted to identify studies in these databases: PubMed, MEDLINE (Ovid), EMBASE (Ovid), PsychINFO, CINAHL, and Sociology Collection. Qualitative content analysis was used to deductively identify themes and was guided by Bronfenbrenner's Ecological Systems Theory, the process-person-context-time (PPCT) model, and the five dimensions of care accessibility (approachability, acceptability, availability and accommodation, appropriateness, affordability). Seventy-three studies met the inclusion criteria. The dimensions of healthcare accessibility shaped the following themes: 1) Acceptability; 2) Appropriateness; 3) Approachability; 4) Availability and Accommodation. Bronfenbrenner's Ecological Systems Theory and the PPCT model informed the development of the following themes: 1) Immediate Environment/ Proximal Processes (Familial Factors, Relationships with Peers); 2) Context (School-Based Services/Community Resources, Discrimination, Prevention, Virtual Care); 3) Person (Engagement in Services/Treatment/Research, Self-management); 4) Time (Immigration Status). The study suggests that there is a growing body of research (21 studies) focused on identifying acceptability factors, including Asian cultural values and the model minority stereotype impacting how East and Southeast Asian immigrant youth access MHSU services. This review also highlighted familial factors (16 studies), including family conflict, lack of MHSU literacy, reliance on family as support, and family-based interventions, as factors affecting how East and Southeast Asian immigrant youth access MHSU care. However, the study also highlighted a dearth of research examining how East and Southeast Asian youth

with diverse identities access MHSU services. This review emphasizes the factors related to the access to MHSU services by East and Southeast Asian immigrant youth and families while providing insights that will improve cultural safety.

## 1. Introduction

Mental health and substance use (MHSU) services worldwide are often characterized as fragmented, under-resourced, and inadequate to meet the needs of youth [1–5]. For young people who identify as immigrant East Asian (i.e., Chinese, Japanese, Hong Kong, Mongolian, Korean, Tibetan and Taiwanese) [6] or Southeast Asian (i.e., Burmese, Cambodian, Filipino, Indonesian, Thai, and Vietnamese) [6] youth, the barriers to obtaining MHSU care are even more significant [7–12]. The challenge of providing effective services that meet the diverse needs of this ethnoculturally minoritized population does not lie in the lack of evidence-based treatments for MHSU disorders but rather in the unavailability of culturally safe access points [13–19]. As a result, there is a crisis of access and engagement for East and Southeast Asian immigrant youth ages 12–24 needing culturally safe, youth-centred MHSU services [10, 12, 14, 20–24]. This is not surprising considering it has long been documented that Asian Americans use mental health services less frequently than the general population, with only 34.1% of Asian Americans with probable mental disorders seeking treatment as compared to 41.1% of their counterparts [25, 26]. Such findings can also be seen in a Canadian context; Canadian data has shown that Chinese British Columbians were less likely than other British Columbians to have reached out to a mental healthcare provider [16].

To address this crisis of access and engagement and deliver effective and culturally safe MHSU care, it is crucial to understand the cultural, social, and historical factors that influence East and Southeast Asian youths' experiences of MHSU and their help-seeking behaviours in the existing literature [27–32]. Tailoring MHSU service delivery to specific populations while acknowledging their unique needs promotes effective and culturally safe care that leads to positive experiences [33–35]. Furthermore, engaging youth in MHSU research is particularly critical in the youth mental health sector [32, 36]. Involving youth in research can be therapeutic in itself by increasing confidence and developing new skills [32, 36]. In addition, youth engagement in MHSU research provides opportunities to connect with peers and draw on peer support networks while also developing skills that they can also apply to provide input into services [37]. Hence, youth-engaged MHSU research that supports the design, delivery, and evaluation of MHSU services can render services more responsive to youth needs, which, in turn, may improve service accessibility [37, 38]. In other words, youth can help organizations become more youth-friendly while broadening their own opportunities and improving their chances of success in various aspects of life [37, 38].

The crisis in MHSU access and engagement by Asian immigrants is likely driven, at least in part, by stereotypes [39]. The “model minority stereotype” (MMS) is the idea that certain minority groups, particularly Asian immigrants, are perceived as more successful, high-achieving, and well-adjusted compared to other minority groups [40, 41]. For this reason, Asian Americans were often compared to other racial minorities to perpetuate structural inequities during the civil rights movement [42]. A negative consequence of the MMS has been its infiltration into mental and physical health—that is, the perception that Asian immigrants in Western countries do not need research or clinical attention [43]. This has reduced resource allocation to this group in MHSU research, clinical care, and outreach [43, 44].

Another factor influencing MHSU access for this population lies in Asian immigrants having a stronger sense of collectivism than many other cultural groups [45]. Studies have linked the role of collectivism to an increased reliance on informal social networks to seek mental health support instead of venturing outside the family unit to seek more formalized support [46, 47]. This has been shown to contribute to a greater reluctance among Asian Americans to seek professional help compared to White Americans [30]. Family-oriented interdependence can also mean that any decision-making process, including the decision to obtain healthcare, is dictated by the interests of the family unit [45, 48]. As mental illness remains highly stigmatized in Asian immigrant communities where this topic is often taboo, concerns about revealing a perceived flaw to the community can spark shame for the whole family, which creates a barrier for accessing mental healthcare as youth with MHSU challenges may deny or hide their symptoms [48–50].

These barriers to accessing MHSU care for Asian immigrant youth are particularly concerning given the heightened risks they face of developing MHSU conditions [51]. For example, research highlights that many Asian immigrant young people grapple with the effects of stress and trauma experienced by their parents and previous generations [52–54]. For those who fled from areas with significant conflict, violence, war, or economic and political oppression, these experiences can often give rise to trauma that remains untreated due to the necessity of prioritizing physical survival [52]. Furthermore, the treatment of Asian immigrants in Western countries, such as the Chinese Head tax and Chinese Exclusion and Alien Land Acts in Canada and the US, respectively, as well as the World War II Japanese internment camps in both Canada and the US, is also a source of historical trauma that is often suppressed by Asian immigrant families [52, 55]. However, a comprehensive synthesis of potentially effective approaches to help Asian immigrant families communicate and process intergenerational trauma in culturally-safe ways has not yet been conducted [55–57].

Finally, it has long been documented that the Asian diaspora in Western countries faces structural racism and racial discrimination, with the COVID-19 pandemic causing a rise in anti-Asian hate crimes fuelled by racist rhetoric [58, 59]. Even before the deadly Atlanta-area spa shootings on March 16, 2021, which was both a race- and sex-based act of anti-Asian violence, Asian people have endured hate incidents in the community [60, 61]. Such racialized experiences may have direct implications for Asian immigrant youth adjustment, with a study implicating an association between discrimination and increases in anxiety, depressive symptoms, and sleep problems [62]. Despite this, there has been a dearth of research addressing the consequences of racism among East and Southeast Asian immigrant youth specifically [63].

It is vital that MHSU providers co-design and tailor MHSU services that consider the various factors and the current needs of youth to offer more effective and culturally safe care, considering this has been shown to reduce barriers to accessing treatment while promoting overall well-being [3, 37, 64]. To date, however, there has been no comprehensive overview of the individual-, familial-, community-, and system-level factors that influence East and Southeast Asian immigrant youths' experiences of MHSU and their help-seeking behaviours. Therefore, we conducted a scoping review to elucidate how East and Southeast Asian immigrant youth and their families access MHSU services.

## 2. Methods

### 2.1. Definitions

In this review, a first-generation immigrant denotes the first of a generation to immigrate to any Western country (e.g., Canada, United States, New Zealand, United Kingdom, the Netherlands, France, Australia, etc.) [65–70]. First-generation immigrants also include refugees,

referred to as individuals seeking asylum in another country, and undocumented, referred to here as individuals who do not possess a visa or any other form of immigration documentation [65, 71–73]. Second-generation immigrants are people born in Western countries with at least one first-generation immigrant parent [65–67]. Third-generation immigrants refer to people born in a Western country with two Western-born parents but at least one grandparent born outside of a Western country [65, 74, 75]. For this paper, first-, second-, and third-generation individuals will all be classified as “immigrants” and included in the study analysis [66, 71–73].

## 2.2. Guiding models

This review was informed by: 1) Bronfenbrenner’s Ecological Systems Theory, affording the application of ecology as a comprehensive theoretical approach embedding East and Southeast Asian immigrant youth within a larger social structure interacting with other social institutional structures; [76–78] 2) Bronfenbrenner’s process-person-context-time (PPCT) model [79–81] and 3) Five dimensions of healthcare accessibility, as conceptualized by Levesque and colleagues [82].

Bronfenbrenner’s Ecological Systems Theory involves five interconnected subsystems—the microsystem, mesosystem, exosystem, macrosystem, and chronosystem—that can be understood as an arrangement of nested subsystems that extend from smallest to largest [76–78]. For this study, East and Southeast Asian immigrant youth are placed in the circle’s centre.

Bronfenbrenner later extended his ideas to develop the PPCT model [79, 80, 83]. In the PPCT model, proximal processes are characterized as the development of gradually more complex interactions and/or relationships between an individual and their surroundings [84, 85]. For personal processes, Bronfenbrenner postulates that an individual’s personal beliefs can reduce or increase the ability of proximal processes to impact individual behaviour and development [84]. Context refers to the environment, ranging from increasingly broad micro to macro levels [84]. Finally, time allows for examining the nature of intergenerational relationships, such as those between parents and children [84]. For this review, key themes were extracted from the literature and analyzed according to the four dimensions of the PPCT model (Fig 1) [79, 80, 83, 84].

Accessibility is a crucial aspect of healthcare systems, but accessibility has been defined in a heterogeneous manner in the literature [82]. In this work, we selected Levesque et al.’s conceptualization of access as it adequately describes expansive factors that balance demand and supply elements while clearly operationalizing healthcare access [82]. The five dimensions of accessibility are: 1) Approachability (i.e., people who have health needs can recognize that services exist, can be reached, and influence individual health outcomes); 2) Acceptability (i.e., factors affecting people’s ability to accept services); 3) Availability and Accommodation (i.e., services can be obtained in a timely and physically accessible fashion); 4) Affordability (i.e., people’s financial capacity to access services); and 5) Appropriateness (i.e., timeliness, the ability of services to meet the needs of service users, attention invested in the evaluation of health problems and the development of a treatment plan, and service quality) [82]. For this review, we used the five dimensions of accessibility to guide the analyses of results [82].

We synthesized and analyzed the patterns and means by which East and Southeast Asian immigrant youth access MHSU services to provide conceptual clarity (Table 1) [82].

## 2.3. Review methods

We used a five-stage method outlined by Arksey and O’Malley (2002) to guide this scoping review [87]. The methods of this review were also guided by a scoping review conducted by Nesbitt et al. (2023) [88]. We did not complete a scoping review protocol a priori.

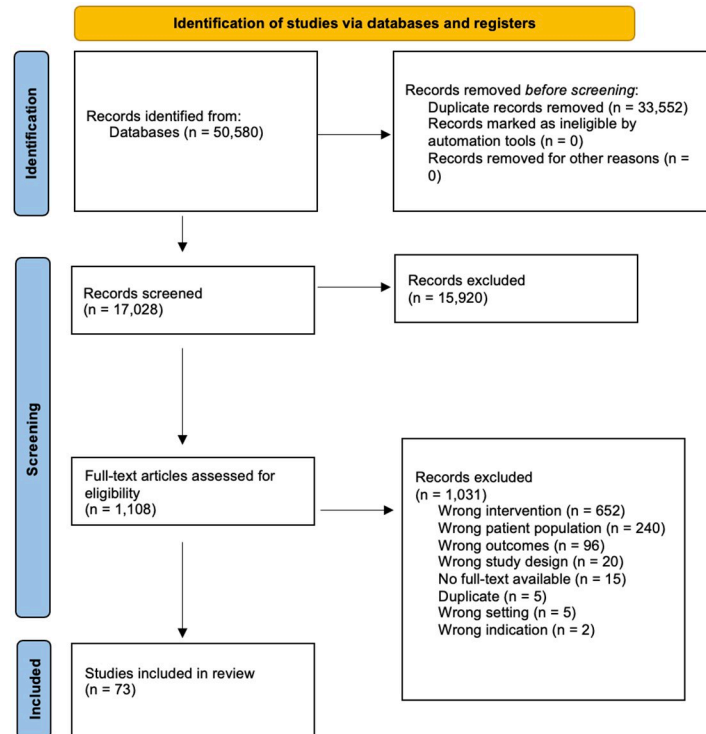

**Fig 1. PPCT and Bronfenbrenner’s Ecological Systems Theory applied to how East and Southeast Asian immigrant youth access MHSU.** Adapted from “Modeling Ecological Risk, Health Promotion, and Prevention Program Effects for Rural Adolescents,” by Q. Wu, 2019, *Journal of the Society for Social Work & Research*, 10(1), 35. Copyright 2019 by the Society for Social Work and Research. Adapted with permission [86].

<https://doi.org/10.1371/journal.pone.0304907.g001>

**2.3.1. Stage 1: Identifying the research question.** We outlined our research question as: What is known about the individual-, familial-, community-, and system-level factors that influence how East and Southeast Asian immigrant youth and their families access MHSU services? We developed a research question in accordance with the population, concept, and context of interest (PCC), as the Joanna Briggs Institute Manual for Evidence Synthesis recommended [89, 90]. We defined each component a priori (Table 1).

**2.3.2. Stage 2: Identifying relevant studies.** CG developed a search strategy in consultation with an experienced librarian at the University of British Columbia. CG searched the following online databases for study identification: MEDLINE (Ovid), EMBASE (Ovid),

**Table 1. PCC criteria [89].**

| PCC Category      | Description                                                                                                                                                                                                                                                                                    |
|-------------------|------------------------------------------------------------------------------------------------------------------------------------------------------------------------------------------------------------------------------------------------------------------------------------------------|
| <b>Population</b> | East and Southeast Asian immigrant youth and families (parents and/or guardians, or extended family of youth) [91–93].<br>Aged 12–24 for youth [94, 95].                                                                                                                                       |
| <b>Concept</b>    | Levesque et al. conceptualized access through five dimensions: 1) approachability; 2) availability; 3) affordability; 4) acceptability; and 5) appropriateness [82].<br>Bronfenbrenner’s Ecological Systems Theory and PPCT models will also guide analysis [79, 80, 83, 96].                  |
| <b>Context</b>    | Research in any setting that captures the context of East and Southeast Asian immigrant youth seeking and/or accessing MHSU services. It is important to note that since barriers to access will also be explored, the population in question does not have to currently access MHSU services. |

<https://doi.org/10.1371/journal.pone.0304907.t001>

PubMed, PsychINFO, CINAHL, and Sociology Collection. The first literature search was conducted in July 2022, and then updated in May 2023 (see S3 for a full list of search strategies).

**2.3.3. Stage 3: Study selection.** EndNote was used to remove duplicate articles for transferred to Covidence, a software for systematic reviews. CG then led the title/abstract screening and the subsequent full-text screening. In terms of eligibility assessment, studies were eligible for inclusion upon meeting the following criteria: a) Population: Referred to as East and Southeast Asian immigrant youth ages 12–24 and families seeking and/or accessing MHSU services (studies including participants beyond this age range were included if they overlap within this age range) [91–95]; b) Concept: Clarified the concept of access according to the five dimensions highlighted by Levesque et al. and/or discussed elements of Bronfenbrenner’s Ecological Systems Theory and PPCT models to provide insight into how East and Southeast Asian immigrant youth access MHSU [79, 80, 82, 83, 96]; c) Study type: All study types were considered except for review articles; and d) Language of publication and date: Written in English with no date restrictions.

**2.3.4. Stage 4: Charting the data.** A data collection form was created and piloted by CG and SB to aid in data organization and interpretation. CG completed data extraction and SB checked the data extraction forms. The following participant characteristics were extracted: 1) the average age of study participants or age range of study participants (depending on how the study reported ages); 2) diagnoses (if present); 3) demographic information; and 4) sample size. Study details extracted were 1) the study purpose and research questions/objectives; and 2) study design (e.g., methods, service characteristics (if applicable), whether youth engagement was present). CG extracted qualitative themes that were highlighted and associated with MHSU service accessibility [79, 80, 82, 83, 96]. Since this is a scoping review and not a systematic review, a quality assessment was not conducted. However, study quality was considered when reviewing the evidence and triangulating different study results [97, 98].

One reviewer (CG) completed the extraction for all studies. Uncertainties in coding and interpretation throughout this review stage were discussed with the senior author, SB.

**2.3.5. Stage 5: Collating, summarizing, and reporting the results.** We conducted qualitative content analysis to delineate patterns and factors influencing how East and Southeast Asian immigrant youth access MHSU [99, 100]. Qualitative themes emerged through inductive analysis through open coding and were subsequently grouped into categories in a deductive manner [79, 80, 82, 83, 96]. The coding and abstraction process was iterative; therefore, several variables extracted were then reorganized considering evolving understandings and narrative patterns, and the development of new subheadings. All content analyses were conducted by one reviewer (CG). All authors then collaborated to gradually refine the analyses and findings through several team-oriented iterative discussions.

We collated and reported our review findings according to the PRISMA-ScR Checklist [101]. In addition, we created an audit trail to keep track of noteworthy decisions among the authors of this review [97]. It has been widely noted that increasing the reflexivity of research can improve the credibility of qualitative data [102–106]. Therefore, guided by principles of reflexivity, we aimed to recognize how our lived experiences may colour our assumptions and biases about how East and Southeast Asian immigrant youth access MHSU services, which may impact our analyses of the collected data [107].

### 3. Results

The initial search identified 50,580 records representing 17,028 unique articles. Screening titles and abstracts left 1,108 articles eligible for review against inclusion criteria. In total, 73 studies were assessed as eligible for inclusion (Fig 2).



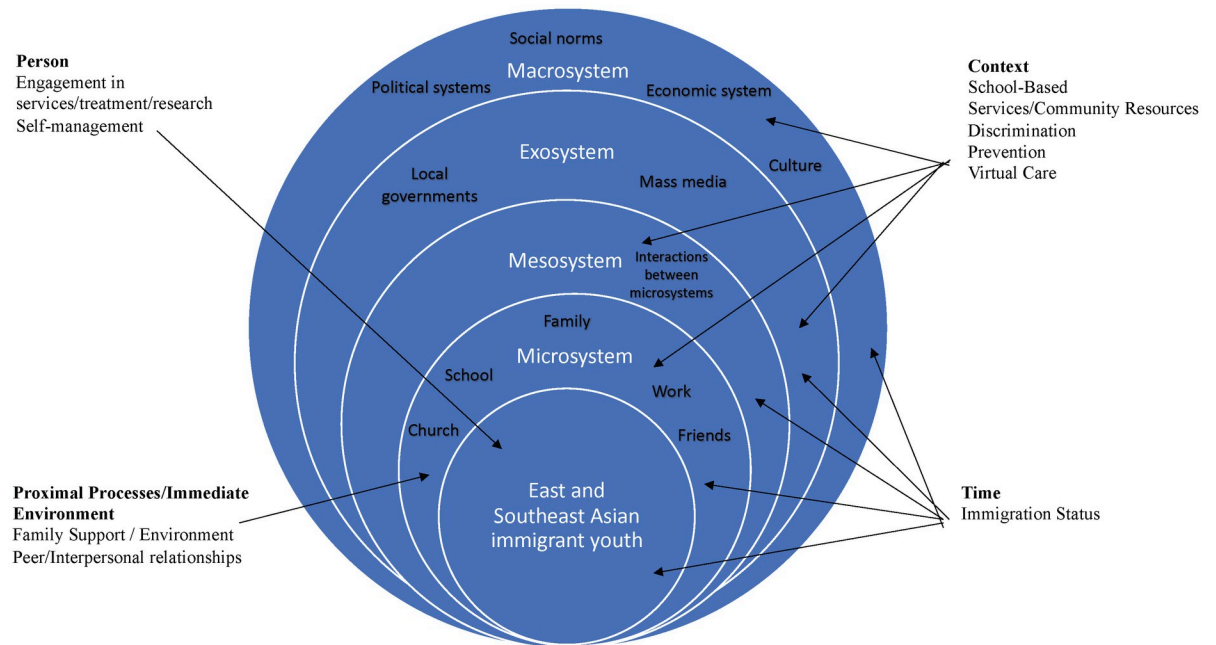

**Fig 2. Flow diagram based on PRISMA guidelines for scoping reviews [101].**

<https://doi.org/10.1371/journal.pone.0304907.g002>

The 73 studies analyzed in this review were published from 1977 to 2023. These studies were conducted in five countries: United States ( $n = 68$ ), Canada ( $n = 1$ ), United Kingdom ( $n = 1$ ), New Zealand ( $n = 2$ ), and Netherlands ( $n = 1$ ). Characteristics of studies are outlined in Table 2 in [S1 Table](#).

Across 73 studies, there was a total sample size of 9,504,599 participants. These studies often included participants aged 18 years and older rather than focusing solely on youth aged 12–24. The ages of participants in the included studies ranged from a mean of 7.8 (2.1 SD) years (childhood) [108] to no upper limit on the age range due to the inclusion of both adults 18–65 as well as parents/guardians of young people in this review. Samples were predominantly Asian, but 21 studies (28.8%) involved more diverse samples due to the addition of various racial and/or ethnic comparator groups (e.g., Indigenous, White, Latino, Black).

In terms of study design, 35 studies were cross-sectional surveys (47.9%), 17 studies were qualitative (23.3%), nine studies used mixed methods (12.3%), six studies were quantitative pre-post interventions (8.2%), four studies were retrospective cohorts (5.5%), two were case studies (2.7%), one study was a case-control (1.4%), and one study was both pre-post and qualitative in its design (1.4%). Thirty-six studies included a sex and/or gender-based analysis in the results (49.3%); however, 33 of the 36 studies (91.7%) did not clearly convey the difference between gender identity and biological sex by using sex and gender interchangeably and/or not specifically acknowledging the presence of more than two genders. Surprisingly, none of the studies captured sexual orientation in its demographic data collection. Furthermore, 23 of the 73 studies (31.5%) did not clarify the immigration status of participants, while 50 studies provided this information in various ways (e.g., first-/second-/or third-generation, or US-born/foreign-born/undocumented immigrant). Importantly, only six studies (8.2%) noted that they engaged youth in the co-creation of the research process.

The research question guiding this review was: What is known about the individual-, familial-, community-, and system-level factors that influence how East and Southeast Asian

immigrant youth and their families access MHSU services? Guided by Bronfenbrenner's Ecological Systems Theory, the PPCT model [76, 79, 84], and the five dimensions of healthcare accessibility [82], themes were deductively developed. The five dimensions of healthcare accessibility shaped the following themes: 1) Accessibility (Acceptability, Appropriateness, Approachability, Availability and Accommodation). One of the five dimensions of accessibility, affordability, did not have any relevant included studies. Bronfenbrenner's Ecological Systems Theory and the PPCT model shaped the remainder of the themes: 2) Immediate Environment/Proximal Processes (Familial Factors, Relationships with Peers; 3) Context (School-Based Services/Community Resources, Discrimination, Prevention, Virtual Care); 4) Person (Engagement in Services/Treatment/Research, Self-management); 5) Time (Immigration Status) (Fig 1) [79, 80, 83, 96].

### 3.1. Accessibility

**3.1.1. Acceptability.** Twenty-one studies discussed the dimension of acceptability in relation to how Asian immigrant youth access MHSU services [109–128]. Several studies found that Asian cultural values can give rise to public stigma, stigma by close others (e.g., family or friends), and self-stigma, which decrease acceptability of MHSU service use [109, 118–122, 125, 127, 129]. This may be explained by unique Asian cultural values such that being 'different' and obtaining mental health support stands in stark contrast to these values [109]. Therefore, people who strongly believe in Asian cultural values might be apprehensive about diverging from these norms and may avoid obtaining mental health support [109].

The literature also describes the MMS as a predictor of unfavourable help-seeking attitudes, which supports the view that the MMS has the potential to influence the perceived mental health functioning of Asian Americans [110, 111, 114]. As a result of the MMS, Asian Americans are perceived as mentally well irrespective of their mental health status [110, 111, 114]. However, Asian Americans' convictions in environmental, biological and/or hereditary causes of mental health conditions increased their seeking professional mental health support [113, 126].

In terms of interventions to increase the acceptability of MHSU services among Asian immigrant youth, improving MHSU literacy has been cited as an important strategy [112, 113, 122–124]. Another commonly cited approach is implementing services whereby Asian immigrant youth are racially matched with their care providers, as perceived differences between themselves and their counselors in regards to worldviews and mental health beliefs is linked to less favourable ratings of the counselor, decreased willingness to visit the counselor, and less favourable counseling outcomes [115, 116, 128, 129].

**3.1.2. Appropriateness.** Two studies described the dimension of appropriateness in relation to how Asian immigrant youth access MHSU services [129, 130]. Ngo-Metzger and colleagues showed that Asian Americans were less likely than White Americans to express that their physicians discussed lifestyle or mental health issues with them [130]. They were also more likely to express that their physicians did not understand their background and values [130]. When asked about the last visit, Asian Americans were more likely to mention that their doctors did not listen to them, spend an adequate amount of time providing care, or engage them in decision-making processes about their healthcare to the extent that they desired [130]. Such findings call into question concerns about the quality of services and user satisfaction [130].

Li and colleagues noted that a key challenge related to providing care for Asian American families is the lack of interpreter access, which renders services inappropriate for culturally and linguistically diverse families seeking care [129].



**3.1.3. Approachability.** Four studies discussed the dimension of approachability about how Asian immigrant youth access MHSU care [131–134]. Included studies emphasized that Asian Americans are an underserved group compared to White Americans, with a lack of knowledge of where to seek help being cited as a barrier. Outreach interventions that normalize the positives and importance of seeking support may be an effective means of increasing service utilization among Asian Americans in need of mental health supports [131–134]. To increase favorable help-seeking outcomes among Asian Americans through outreach, Kim & Kendall (2015) suggest that assessing etiology beliefs may be effective in obtaining data related to an Asian American client's help-seeking attitude [133]. For example, for a client who has firm spiritual or biological causes, the provider may posit that their help-seeking behaviours and intentions may be more favorable. Counselors may find it worthwhile to design psychoeducational outreach programs focusing specifically on the etiology of mental health problems, to facilitate help-seeking [133].

**3.1.4. Availability and accommodation.** Three studies expand on the concept of availability and accommodation through various logistic difficulties, including language and communication difficulties in using a translator due to differences in language structure and emotional expressions [135], as well as documentation status serving as a barrier in accessing MHSU services among undocumented Asian and Pacific Islander young adults [136, 137].

## 3.2. Immediate Environment/Proximal Processes

**3.2.1. Familial factors.** *3.2.1.1. Family conflict.* Four studies addressed the influence of family conflict on MHSU problems and help-seeking behaviours [137–140]. Family conflict was a common reason for seeking MHSU services [138]. Reasons for family conflict among Asian immigrant families included family tension due to immigration-related separation and reunification with different caretakers [137], cultural differences between children and parents [137], lack of time spent with children due to the multiple competing demands of parents struggling to support their families [137], and pressure by family to succeed academically and occupationally [139]. Individuals experiencing high levels of family conflict had a higher probability of seeking formal medical and mental health care services, suggesting that family conflict may act as a powerful interpersonal stressor, precipitating distress and subsequent help-seeking behaviours [137–140]. This demonstrates the importance of service providers in medical and MHSU sectors treating observations or reports of family conflict seriously, as such disclosure may indicate significant distress for Asian immigrants [138, 140]. It also suggests that certain MHSU interventions may be more appropriate for Asian immigrant youth and families, such as family and interpersonal therapies to address family conflict and relationship dynamics [141, 142].

*3.1.1.2. Reliance on family as support for help-seeking.* Two studies highlighted reliance on family as support [143, 144]. Lee (2015) emphasized how migration dissolved pre-existing social networks, precluding first-generation respondents from turning to local family networks for support [144]. In another study, both Asian American and Caucasian adolescents preferred to seek help from informal sources, such as parents and peers, rather than formal sources, such as therapists and school counselors [143]. Such findings emphasize the reliance on family for mental health support among Asian immigrants.

*3.1.1.3. Youth and parent MHSU literacy.* Two studies found that a lack of MHSU literacy was a commonly cited barrier to help-seeking [145, 146]. Asian immigrant parents often do not have an in-depth understanding of the causes and therapies for depression, with parents frequently neglecting their children's depression until brought forward by schools [145]. Asian immigrant youth received parental perspectives that portrayed stigmatizing ideas of mental

illness while negating its legitimacy and validity [146]. Parents often responded to young people experiencing distress by promoting culturally specific coping strategies, dismissing mental distress, or with no response [146]. Given that Arora & Khoo (2020) identified permission from parents to utilize mental health services and parental responses to expressed MHSU needs as being barriers to service access, these results emphasize the importance of promoting mental health literacy in Asian immigrant families [147].

**3.1.1.4. Culturally safe family-based interventions.** Eight studies highlighted culturally tailored family-based interventions for Asian immigrant youth and their families [108, 129, 148–153]. Highlighted interventions and their effects are outlined in Table 2.

Various positive outcomes resulted from these interventions such as increased mental health literacy among youth and families, improved sentiments about seeking MHSU services, parent-child relationships, and parenting skills, as well as increased resilience to substance use [108, 129, 148–152]. However, Li and colleagues noted several challenges that often preclude families from engaging in such interventions, including low MHSU literacy and stigma and shame about MHSU [129].

**3.2.2. Relationships with peers.** Three studies discussed the influence of relationships with peers on MHSU help-seeking behaviours among Asian immigrant youth [139, 143, 154]. One mixed-method study found that many Chinese American students who had not used formal school health services but acknowledged a physical or mental health concern and sought support for this concern from teachers and peers [154]. In contrast, another mixed-method study found that Asian American youth have a preference for seeking help through peer networks rather than more formal networks such as counselors [143]. In addition, as part of a qualitative study, youth suggested using Asian American peers with personal experiences with mental health treatment sharing their direct experiences to reduce stigma and normalize mental health concerns among Asian American immigrant youth. Such findings provide further support for the role of formalized peer support programs to increase mental health literacy and reduce stigma among youth [139].

### 3.3. Context

**3.3.1. School-Based services/community resources.** School-based MHSU services and/or community resources for Asian immigrant youth and families were addressed by nine studies [122, 131, 137, 139, 154–158]. One study revealed that religious identity was significantly associated with increased self-esteem over time and reduced depressive symptoms for females, but not for males [155]. Religious identity and participation were each positive and significantly linked to positive affect and the presence of meaning in life for both males and females [155]. These findings emphasize the utility of further examining how a religious community member may play a role in health and well-being, particularly among Asian American adolescents [155]. Goodkind (2005) developed an intervention for Hmong refugees that has two components: 1) Learning Circles involving cultural interchange and individual learning experiences for Hmong individuals; and 2) an advocacy component engaging undergraduate students advocating for and providing advocacy skills to Hmong families to increase access to resources within their community [156]. Participants' increased quality of life could be attributed to their increased satisfaction with this community-based advocacy and learning program [156].

The other seven studies described the role of school-based services in influencing Asian immigrant youth's mental health and well-being and how services are accessed [122, 131, 137, 139, 154, 157, 158]. Several studies found that Asian immigrant youth, controlling for confounders, had significantly lower odds of using their school-based MHSU prevention program

**Table 2. Culturally safe family-based interventions descriptions and effects.**

| Intervention(s)                                                                                                                       | Description                                                                                                                                                                                                                                                                                                                                                                                                                                                                                                                                                                                                                         | Effects                                                                                                                                                                                                                                                                                                                                                                                                                                        |
|---------------------------------------------------------------------------------------------------------------------------------------|-------------------------------------------------------------------------------------------------------------------------------------------------------------------------------------------------------------------------------------------------------------------------------------------------------------------------------------------------------------------------------------------------------------------------------------------------------------------------------------------------------------------------------------------------------------------------------------------------------------------------------------|------------------------------------------------------------------------------------------------------------------------------------------------------------------------------------------------------------------------------------------------------------------------------------------------------------------------------------------------------------------------------------------------------------------------------------------------|
| Ongoing community engagement related to knowledge translation of study findings [148].                                                | Study findings were shared in a community conversation event focused on Filipino family wellness, multiple outreach presentations to encourage parents to enroll in programs aimed at improving parent-child relationships, and a toolkit on supporting mental health in the Filipino community [148].                                                                                                                                                                                                                                                                                                                              | No effects were reported.                                                                                                                                                                                                                                                                                                                                                                                                                      |
| Online substance use prevention program [149].                                                                                        | Nine-session virtual substance use prevention program for Asian American adolescent girls and mothers [149].                                                                                                                                                                                                                                                                                                                                                                                                                                                                                                                        | Intervention yielded increased closeness and communication between mothers and daughters, improved maternal oversight, and familial restrictions around substance use. Intervention also led to improvements in self-efficacy and refusal skills and decreased intentions to use substances. Intervention-arm girls engaged in decreased levels of alcohol and marijuana use and prescription drug misuse than control-arm counterparts [149]. |
| Provider education/recommendations about culturally safe communication strategies with Asian American youth and their families [129]. | The following strategies are recommended when promoting MHSU services among Asian American families: 1) Highlight that treatment can help school performance and honor the importance of the family in the client's life; 2) Realize that "yes" does not always mean yes, as Asian American families typically value harmony and hierarchy rather than showing disagreement. Consequently, they may agree with the recommendation of the treatment providers despite not intending to follow through on recommendations; and 3) Note that there are still several challenges related to working with Asian American families [129]. | No effects were reported.                                                                                                                                                                                                                                                                                                                                                                                                                      |
| Essay competition called "Hear Me Out" on topics of cross-generational communication among Asian American families [122, 151].        | An essay competition entitled "Hear Me Out" was planned. Essay subjects related to intergenerational familial communication among Asian American youth and families to present their essays. Young people shared what they wanted their parents to understand while parents shared what they wanted their children to understand [122, 151].                                                                                                                                                                                                                                                                                        | Young people and their families acknowledged that they have different values due to differences in past experiences [122, 151].                                                                                                                                                                                                                                                                                                                |
| ParentTeen Connect Workshop Series emerging from "Hear Me Out" [122, 151].                                                            | The ParentTeen Connect workshop series seeks to increase understanding of mental health among Asian American youth, improve parents' knowledge of mental health, and promote supportive parenting strategies to support child and family mental health [122, 151].                                                                                                                                                                                                                                                                                                                                                                  | Program was well-received by parents as it supported their learning of supportive parenting skills [122, 151].                                                                                                                                                                                                                                                                                                                                 |
| Parent-child empowerment workshops for Asian American families [108].                                                                 | Workshops covered topics such as acculturative stress, mental health, intergenerational conflict, quality of parent-child relationship, interpersonal difficulties, and racism. Participants had improved psychosocial functioning post-workshops [108].                                                                                                                                                                                                                                                                                                                                                                            | Parental feedback emphasized the effectiveness of a holistic approach including group psychoeducation and in-session interventions developed to improve communication between parents and children [108].                                                                                                                                                                                                                                      |
| Korean Family Communications (KFC) Program manual for Korean American parents of teens [152].                                         | This parental training program strives to improve mental health literacy, stigma, family communication, and help-seeking attitudes [152].                                                                                                                                                                                                                                                                                                                                                                                                                                                                                           | Initial findings show increased mental health literacy and help-seeking attitudes. The program was well-regarded by Korean-American parents [152].                                                                                                                                                                                                                                                                                             |
| Program recommendation of preventive parenting programs in faith settings [153].                                                      | Healthcare providers recommended implementing preventive parenting programs in faith settings as a community-centred and culturally safe strategy to prevent Filipino youth mental health inequities [153].                                                                                                                                                                                                                                                                                                                                                                                                                         | No effects were reported.                                                                                                                                                                                                                                                                                                                                                                                                                      |

<https://doi.org/10.1371/journal.pone.0304907.t002>

than Black or Latino youth [131, 154]. Potential barriers to access include the shame of not living up to the MMS [137], not feeling welcomed at their school health programs [154], misconceptions of school health programs (e.g., services exist only for academic issues), and lack of awareness of the existence of such programs [139]. For those who did access services, relationships with school health program staff and their ability to refer to relevant school health

programs served as key factors influencing youths' openness to engage in stigmatized services, such as contraception counselling or mental health therapy [131, 154]. Furthermore, initiating school-based to promote mental health awareness [157] and programs that address the intersection of traditional and American values were recommended to improve MHSU literacy and service access in school settings [158]. It was recommended that teachers and administrators should also strive to create a positive school environment by encouraging the development of supportive relationships among students, their peers, and their teachers [122].

**3.3.2. Discrimination.** One qualitative study highlighted that the MMS, the “perpetual foreigner” stereotype (presents racial minority youth as the “other” in White-dominant spaces) [159], or assumptions that Asian youth were more vulnerable to bullying, contributes to worsened mental health outcomes among Asian American youth. There was an acknowledgement of the importance of directly confronting discriminatory behaviours, which moderated the effectiveness of mental health services. Consequently, healthcare professionals, community leaders, and educators expressed that Asian American young people and families should strive to challenge racial discrimination and dismantle mental health stigma [137].

**3.3.3. Prevention.** Two studies discussed approaches for preventing the onset of MHSU problems among Asian immigrant youth [160, 161]. Wang et al. (2022) and Havewala et al. (2022) culturally adapted youth mental health first aid for Asian Americans and found participants' mental health literacy and their confidence in using mental health first aid skills significantly increased after the training [160, 161]. Such findings suggest that culturally tailored youth mental health first aid may improve mental health literacy and improve Asian American adults' ability to support youth [160, 161].

**3.3.4. Virtual care.** The rates of help-seeking for youth mental health services are lower within the Chinese community because of the limited communication strategies to ensure that healthcare information is accessible to this population [162]. However, one study highlighted that developing culturally safe smartphone applications for a Chinese immigrant community may increase knowledge about youth mental health and the delivery of services and resources [162].

## 3.4. Person

**3.4.1. Engagement in services/treatment/research.** Regarding service engagement, which was addressed by 16 studies, one study found that English-speaking Asians were 11% more likely than English-speaking White people to discontinue mental health services [163]. Another study identified several person-related barriers to engaging in services for Asian immigrant youth, including discomfort opening up with others, confidentiality, beliefs around the perceived effectiveness of mental health treatment, and lack of time to dedicate to mental health service use [147].

Many studies noted that East and Southeast Asian immigrant youth had significantly lower MHSU service utilization than White individuals or the general population [164–171]. Asian American subgroups have different MHSU problems and service access patterns. Substance use disorders were most frequently observed in Southeast Asians. However, Southeast Asians with substance use disorders did not use mental health services as frequently in comparison to their South Asian counterparts. Similarly, East Asians, when compared to South Asians, had decreased odds of using mental health supports for their substance use disorders [172].

Studies reported that Asian immigrant youth have increasingly significant MHSU needs, as evidenced by a greater increase in admissions among Asian American and Pacific Islanders than non-Asian American and Pacific Islanders from 2000 to 2012 for substance use in the US

[173]. Higher needs were associated with higher odds of MHSU service use [174, 175], and those who had used services also exhibited higher odds of reporting unmet needs [175].

In terms of engagement in research, two studies emphasized that youth can actively engage in multiple stages of the research process [176, 177]. Collaborative partnerships with Asian immigrant youth, alongside adults in the community, can aid in the development of culturally appropriate instruments and provide useful outcomes for research and community advocacy endeavors [176, 177]. As was previously stated, youth engagement in MHSU research to support the design, delivery, and evaluation of MHSU services can increase service accessibility by making services more youth-centred and culturally-specific [37, 38].

**3.4.2. Self-management.** One study highlighted self-management strategies for coping with mental health problems among Asian immigrant youth. Healthy coping mechanisms include playing sports and spending time with friends and family. In addition, healthcare professionals, community leaders, and educators stated that gang activity, substance use, online gaming addiction, school misconduct, and absenteeism were deemed the most common maladaptive coping strategies used by young people [137].

### 3.5. Time

**3.5.1. Immigration status.** Ten studies described how generational immigration status affected how Asian immigrants accessed MHSU services, with mixed findings [109, 114, 137, 140, 167, 170, 171, 174, 176, 178]. Three studies found that US-born individuals (i.e., second- and higher-generation immigrants) were more likely than foreign-born individuals (i.e., first-generation immigrants) to use MHSU services [167, 170, 174]. Such differences reflected perceptions of their treatment experiences [167]. In one study, perceived helpfulness of care differed by immigration status: Asian Americans born in the US, especially those who are third-generation or later, perceived services to be more helpful. The finding that second-generation and first-generation Asian Americans differ from third-generation Americans in their patterns of service use, as well as their perceptions on how helpful care is, suggest that second-generation individuals are more like their immigrant parents in how they access mental health services than their third-generation children [167]. However, one study found that the use of MHSU services did not reflect service needs; instead, unmet mental health needs were highest among non-US-born Asian American young adults ages 18–24 years [178].

Two studies commented on the unique experiences of second-generation immigrants relative to first- and third-generation immigrants [137, 140]. Chang and colleagues (2013) found that second-generation Asian Americans with higher levels of familial cultural conflict were more likely to utilize mental health services compared to their third-generation counterparts [140]. The role that family conflict plays in driving an uptick in mental health utilization by second-generation Asian Americans, compared with third-generation or later, highlights the uniqueness of the second-generation. According to the dissonant perspective of acculturation, conflict is magnified when second-generation immigrants acculturate faster to American culture than their first-generation parents, which, in turn, may render second-generation Asian immigrants more likely to seek MHSU services [179, 180]. Ling and colleagues (2014) also found that second-generation Asian American adolescents grappled with parental conflicts with parents who have a different cultural background, while first-generation newly immigrated adolescents experienced cultural and linguistic challenges, which impacted their self-esteem and agency [137].

In terms of research engagement to shape health and public policies, one study by Wong et al. (2015) highlighted that second-generation or later youth would be more likely to participate in research than newer migrants [176]. Given the aforementioned association between



increased youth engagement in MHSU research and improved service accessibility and youth-centredness [37, 38], it is important to increase MHSU research engagement among newer migrants. Finally, three studies did not identify immigration status as a significant factor impacting how MHSUs are accessed among Asian immigrants in the US [109, 114, 171].

#### 4. Discussion

This scoping review serves as a synthesis of factors related to how East and Southeast Asian immigrant youth access MHSU services. Guided by Bronfenbrenner's Ecological Systems Theory [83, 96] and the five dimensions of healthcare accessibility conceptualized by Levesque et al. [82], the following themes were developed: 1) Intermediate Environment/Proximal Processes; 2) Context; 3) Person; 4) Time (Immigration Status); and 5) Accessibility (Approachability, Availability/Accommodation, Acceptability, Appropriateness). These themes reveal the complex processes underlying how East and Southeast Asian immigrant youth access MHSU services and the need to develop an intersectional understanding of such processes.

The current review uncovered a broad scope encapsulating how East and Southeast Asian immigrant youth access MHSU services and the barriers they experience. The central role of familial support, as well as the importance of improving the accessibility of care through addressing cultural barriers to seeking care, were uniquely highlighted in the review findings [109, 129, 131, 137, 144, 148–150]. Identifying acceptability factors affecting how East and Southeast Asian immigrant youth access MHSU services was the focus of the greatest number of studies [109–128]. The acceptability [109–128] factors highlighted align with findings from previous immigrant MHSU research highlighting cultural and social factors and the lack of fit between services and patients' needs, as key challenges to accessing MHSU services [45, 181–185]. Furthermore, within the context of accessibility, researchers have increasingly emphasized the importance making MHSU services more accessible to ethnoculturally minoritized youth [31, 186, 187].

There was also a substantial portion of literature dedicated to identifying family influences on how MHSU services are accessed among East and Southeast Asian immigrant youth [108, 122, 129, 137, 138, 140, 143–153]. The family factors identified here, including family conflict, lack of MHSU literacy, reliance on family as support, and culturally safe family-based interventions, largely overlap with the family factors that have been highlighted in the adult Asian MHSU literature due to an emphasis on collective cultural strengths (i.e., family values) [108, 122, 129, 137, 138, 140, 143–152, 181, 182, 188–192]. Results demonstrate a variety of means by which family factors can be leveraged to develop more culturally safe services for East and Southeast Asian immigrant youth and families seeking MHSU care [115–119, 143, 150, 151].

However, findings suggest it is important to note that the family factors listed above cannot be understood in isolation of individuals' micro-environment, such as peer relationships and self-management [139, 143, 154], as well as contextual factors such as education, structural racism, prevention, and the digitalization of care that impact how East and Southeast Asian immigrant youth access MHSU services [131, 137, 139, 153, 154, 160–162]. Several studies considered community/environmental resources that involved the youth's immediate environment (school, personal support networks, health service quality and outcomes) [139, 143, 154]. Moreover, there is currently a lack of evidence on East and Southeast Asian immigrant youth belonging to two-spirit, lesbian, gay, bisexual, transgender, queer and/or questioning, intersex, asexual, and additional sexual orientations and gender identities (2SLGBTQIA+) [193–199]. Improving our understanding of the intersectional experiences of diverse East and Southeast Asian youth would reveal important social and contextual factors that give rise to MHSU inequities [200–203].

The review highlighted that East and Southeast Asian immigrant youth experience challenges and barriers while seeking MHSU services, which emphasizes the value of developing culturally safe care early intervention MHSU services for this population [204–206]. Furthermore, future research is needed to examine how racist stereotypes, such as the MMS, can be deconstructed at both individual- and macro-levels to improve the experiences of youth accessing care [111, 133, 207, 208]. Importantly, more research is needed to examine the unique strengths inherent in family structures and how these can be leveraged to support MHSU service access and healthy child development (e.g., commitment to their children and instrumental support practices, close intergenerational relationships, familial resilience and growth mindset) [45, 150, 151, 209–212]. Importantly, the majority of included studies reflect systematic issues in data collection, including practices that lead to the grouping of unlike individuals (e.g., Chinese, Vietnamese, and Bangladeshi) together in data collection systems [213]. The lack of disaggregated data for subpopulations with unique ethnic, cultural, linguistic, and migration histories fuels stereotypes of Asian immigrants and makes it difficult to delineate the drivers and experiences of health disparities among these diverse groups [213, 214]. Finally, considering the importance of engaging people with lived experience in the design, conduct, and dissemination of research findings, more research that engages East and Southeast Asian immigrant youth and families is warranted to gain a better understanding of the factors that are most important to those seeking MHSU services [10, 215].

The results of this review extended prior research on Asian immigrant youth MHSU by identifying factors related to how MHSU services are accessed rather than the state of Asian immigrant MHSU and/or MHSU service access [173, 216–219]. Moreover, while there have been reviews of evidence related to mental health status and the influence of cultural and social factors on mental health among Asian immigrants, there has not yet been a review focused specifically on factors influencing how East and Southeast young people access MHSU services [10, 12, 34, 201, 220–229]. Furthermore, by identifying factors that influence how East and Southeast Asian immigrant youth access MHSU services, findings can inform the development of culturally-safe MHSU services for this population [37, 230, 231]. Consequently, findings are relevant and valuable for the design, development, and evaluation of MHSU interventions that may positively promote East and Southeast Asian youth's healthy development [37, 230, 231].

#### 4.1 Strengths and limitations

This review has several limitations. Firstly, we did not perform a formalized quality assessment of the included studies, despite it being optional in scoping reviews [87, 98, 232]. Second, variability in how the population (youth), race (East and Southeast Asian immigrants), and concept (MHSU services) have been defined rendered it challenging to draw specific conclusions about how East and Southeast Asian youth ages 12–24 specifically access MHSU services. Moreover, 68 of the 73 studies were US-based, which may decrease the generalizability of the results to other Western countries and contexts due to the unique characteristics of the American healthcare system, as well as the distinct socioeconomic and political contexts [233]. We also recognize that this review was limited to studies that included East Asian and Southeast Asian youth. Opportunity exists for future research to explore the needs of other Asian ethnic populations (e.g., South Asian).

Using recent guidelines for conducting transparent and high-quality scoping reviews is a strength of the current review [97, 101, 234]. Additionally, this review was conducted by an interdisciplinary team with backgrounds in medicine (CG) public health (KM, MRL), occupational therapy/rehabilitation sciences (AD, SB), and psychiatry (LC, SK, NS). The diverse perspectives of the review team enriched the analyses and interpretation of data.

## 4.2. Future research directions

Based on this review, we recommend four areas for future research about how East and Southeast Asian immigrant youth access MHSU services:

1. Research that engages youth, family, and community members is warranted to generate research and knowledge translation activities that reflect the needs of MHSU service users [10, 112, 150, 156, 215].
2. How racist stereotypes, such as the MMS, can be deconstructed at both individual- and macro-levels to promote help-seeking behaviours and increased resource allocation for East and Southeast Asian immigrant youth seeking MHSU services [111, 133, 207, 208].
3. Understanding unique strengths inherent in family structures and how these can be leveraged to support MHSU help-seeking behaviours and healthy child development (e.g., commitment to their children and instrumental support practices, close intergenerational relationships, parental resilience and growth mindset) [45, 150, 151, 209–212].
4. Improving quality infrastructure and biases on the part of researchers, healthcare providers, and the public health community through disaggregating data for diverse subpopulations within Asian immigrant communities [213, 214].

## 4.3. Future considerations for practice and policy

The findings from this study have significant policy and practice implications. Considering the underutilization of MHSU services among East and Southeast Asian immigrant youth, studying these results can promote MHSU services among this understudied population by informing efforts to create culturally safe services for youth and families [235–237]. Findings from this study point to the importance of addressing biases and stereotypes among key stakeholders in a young person's life (e.g., teachers and healthcare providers) to ensure that MHSU issues can be appropriately identified, diagnosed, and managed for East and Southeast Asian immigrant youth [111, 133, 207, 208]. Interventions focused on MHSU literacy, delivered to youth and families in community settings such as schools, might also improve knowledge about and reduce stigma related to MHSU issues [122, 131, 137, 139, 145, 146, 154–158]. Since youth often prefer to seek help from peers, implementing MHSU peer support services for East and Southeast Asian immigrant youth might help to decrease stigma and promote help-seeking behaviours in this population [139, 143, 154]. Moreover, to be truly culturally safe, policy and programmatic changes need to make evidence-informed decisions based on disaggregated datasets that account for the diverse diasporic subjectivities across subpopulations of Asian immigrant youth [213, 214]. Finally, programs and policies need to be rigorously evaluated through patient-oriented research to ensure interventions reflect the needs of East and Southeast Asian immigrant youth [238, 239].

## 5. Conclusions

The crisis of access and engagement for East and Southeast Asian immigrant youth needing culturally safe, youth-centred MHSU services has been acknowledged among researchers and clinicians. Review findings generate meaningful insights into factors affecting how East and Southeast Asian immigrant youth access MSHU services. Further research is encouraged that adopts family-centred, youth- and family-engaged strengths-based perspectives to enhance

our understanding of MHSU service access among East and Southeast Asian immigrant youth and their families.

## Supporting information

**S1 Table. Details of included studies (n = 73) exploring how East and Southeast Asian youth access MHSU services.**

(DOCX)

**S1 Checklist. PRISMA-ScR checklist.**

(DOCX)

**S1 File. Full electronic search strategies for all databases.**

(DOCX)

## Acknowledgments

We would like to acknowledge Charlotte Beck, Occupational Science and Occupational Therapy (University of British Columbia), for helping to develop the search strategy for our scoping review. We would also like to acknowledge Kelli Wuerth for their expertise and assistance in reviewing the manuscript and providing helpful comments and suggestions. Finally, we would like to acknowledge undergraduate students Rae Zimmerman and Taite Beggs for their assistance in reviewing the study screening and selection process.

## Author Contributions

**Conceptualization:** Chloe Gao.

**Data curation:** Chloe Gao.

**Formal analysis:** Chloe Gao, Lianne L. Cho, Avneet Dhillon.

**Investigation:** Chloe Gao.

**Methodology:** Chloe Gao, Lianne L. Cho.

**Project administration:** Chloe Gao.

**Validation:** Chloe Gao.

**Visualization:** Chloe Gao.

**Writing – original draft:** Chloe Gao, Lianne L. Cho, Avneet Dhillon, Soyeon Kim, Kimberlyn McGrail, Michael R. Law, Nadiya Sunderji, Skye Barbic.

**Writing – review & editing:** Chloe Gao, Lianne L. Cho, Avneet Dhillon, Soyeon Kim, Kimberlyn McGrail, Michael R. Law, Nadiya Sunderji, Skye Barbic.

## References

1. Glowacki K, Affolder J, Macnab B, Ewert A, Tee K, Wenger M, et al. Infusing wellness opportunities into integrated youth services. *BMC Psychiatry*. 2023; 23(1):403. Epub 20230605. <https://doi.org/10.1186/s12888-023-04809-6> PMID: 37277769.
2. Hawke LD, Barbic SP, Voineskos A, Szatmari P, Cleverley K, Hayes E, et al. Impacts of COVID-19 on Youth Mental Health, Substance Use, and Well-being: A Rapid Survey of Clinical and Community Samples: Répercussions de la COVID-19 sur la santé mentale, l'utilisation de substances et le bien-être des adolescents: un sondage rapide d'échantillons cliniques et communautaires. *Can J Psychiatry*. 2020; 65(10):701–9. Epub 20200714. <https://doi.org/10.1177/0706743720940562> PMID: 32662303.

3. McGorry PD, Mei C, Chanen A, Hodges C, Alvarez-Jimenez M, Killackey E. Designing and scaling up integrated youth mental health care. *World Psychiatry*. 2022; 21(1):61–76. <https://doi.org/10.1002/wps.20938> PMID: 35015367.
4. Mathias S, Tee K, Helfrich W, Gerty K, Chan G, Barbic SP. Foundry: Early learnings from the implementation of an integrated youth service network. *Early Interv Psychiatry*. 2022; 16(4):410–8. Epub 20210518. <https://doi.org/10.1111/eip.13181> PMID: 34008340.
5. Mendenhall A, Fristad M, Early T. Factors Influencing Service Utilization and Mood Symptom Severity in Children With Mood Disorders: Effects of Multifamily Psychoeducation Groups (MFPGs). *J Consult Clin Psychol*. 2009; 77:463–73. <https://doi.org/10.1037/a0014527> PMID: 19485588
6. Asian Pacific Institute on Gender-Based Violence. Census Data & API Identities Asian Pacific Institute on Gender-Based Violence [cited 2023 September 18]. <https://www.api-gbv.org/resources/census-data-api-identities/>.
7. Moroz N, Moroz I, D'Angelo MS. Mental health services in Canada: Barriers and cost-effective solutions to increase access. *Healthc Manage Forum*. 2020; 33(6):282–7. <https://doi.org/10.1177/0840470420933911> PMID: 32613867.
8. Pishori A. The Impact of Stigmatized Identities and Culture on the Mental Health of East and South Asian Americans. Doctoral Dissertations University of Connecticut 2015.
9. Saunders NR, Gill PJ, Holder L, Vigod S, Kurdyak P, Gandhi S, et al. Use of the emergency department as a first point of contact for mental health care by immigrant youth in Canada: a population-based study. *CMAJ*. 2018; 190(40):E1183–e91. <https://doi.org/10.1503/cmaj.180277> PMID: 30301742.
10. Li H, Seidman L. Engaging Asian American youth and their families in quality mental health services. *Asian J Psychiatr*. 2010; 3(4):169–72. <https://doi.org/10.1016/j.ajp.2010.08.008> PMID: 23050882.
11. Southeast Asia Resource Action Center & Lee Lo. Southeast Asian American Mental Health in California United States 2020.
12. Hsu E, Davies CA, Hansen DJ. Understanding mental health needs of Southeast Asian refugees: Historical, cultural, and contextual challenges. *Clin Psychol Rev*. 2004; 24(2):193–213. <https://doi.org/10.1016/j.cpr.2003.10.003> PMID: 15081516
13. Mental Health Commission of Canada. Consensus Statement on the Mental Health of Emerging Adults—Making Transitions a Priority in Canada. Ottawa 2017.
14. Ran M-S, Hall BJ, Su TT, Prawira B, Breth-Petersen M, Li X-H, et al. Stigma of mental illness and cultural factors in Pacific Rim region: A systematic review. *BMC Psychiatry*. 2021; 21(1):8. <https://doi.org/10.1186/s12888-020-02991-5> PMID: 33413195
15. McKenzie KA, Branka; Tuck Andrew; Antwi Michael The Case for Diversity—Building the Case to Improve Mental Health Services for Immigrant, Refugee, Ethno-cultural and Racialized Populations. Ottawa: Mental Health Commission of Canada, 2016.
16. Chen AW, Kazanjian A, Wong H. Why do Chinese Canadians not consult mental health services: health status, language or culture? *Transcult Psychiatry*. 2009; 46(4):623–41. <https://doi.org/10.1177/1363461509351374> PMID: 20028680.
17. Richardson S, Williams T. Why is cultural safety essential in health care? *Med Law*. 2007; 26(4):699–707. PMID: 18284111.
18. Leong FTL, Lau ASL. Barriers to Providing Effective Mental Health Services to Asian Americans. *Ment Health Serv Res*. 2001; 3(4):201–14. <https://doi.org/10.1023/a:1013177014788> PMID: 11859966
19. Scharrer M, Coleman F. Culturally Driven Mental Health Care in Hmong and Cambodian Refugee Populations. *Am J Geriatr Psychiatry*. 2019; 27(3, Supplement):S143–S4. <https://doi.org/10.1016/j.jagp.2019.01.053>
20. Mental Health Commission of Canada. Taking the Next Step Forward: Building a Responsive Mental Health and Addictions System for Emerging Adults Ottawa, ON 2015.
21. Iyer SN, Boksa P, Lal S, Shah J, Marandola G, Jordan G, et al. Transforming youth mental health: A Canadian perspective. *Ir J Psychol Med*. 2015; 32(1):51–60. <https://doi.org/10.1017/ipm.2014.89> PMID: 31715701.
22. D'Avanzo CE. Southeast Asians: Asian-Pacific Americans at Risk for Substance Misuse. *Subst Use Misuse*. 1997; 32(7–8):829–48. <https://doi.org/10.3109/10826089709055861> PMID: 9220559
23. Hyman I, Vu NHI, Beiser M. Post-Migration Stresses Among Southeast Asian Refugee Youth in Canada: A Research Note. *J Comp Fam Stud*. 2000; 31(2):281–93.
24. Bemak F, Greenberg B. Southeast Asian Refugee Adolescents: Implications for Counseling. *J Multicult Couns Dev*. 1994; 22(2):115–24. <https://doi.org/10.1002/j.2161-1912.1994.tb00250.x>



25. Woo BK. Comparison of Mental Health Service Utilization by Asian Americans and Non-Hispanic Whites versus Their Cardiovascular Care Utilization. *Cureus*. 2017; 9(8):e1595. Epub 20170822. <https://doi.org/10.7759/cureus.1595> PMID: 29062627.
26. Lee HB, Hanner JA, Cho SJ, Han HR, Kim MT. Improving access to mental health services for Korean American immigrants: Moving toward a community partnership between religious and mental health services. *Psychiatry Investig*. 2008; 5(1):14–20. Epub 20080331. <https://doi.org/10.4306/pi.2008.5.1.14> PMID: 20046403.
27. Murney MA, Sapag JC, Bobbili SJ, Khenti A. Stigma and discrimination related to mental health and substance use issues in primary health care in Toronto, Canada: A qualitative study. *Int J Qual Stud Health Well-being*. 2020; 15(1):1744926. <https://doi.org/10.1080/17482631.2020.1744926> PMID: 32228393.
28. Stubbe DE. Practicing Cultural Competence and Cultural Humility in the Care of Diverse Patients. *Focus (Am Psychiatr Publ)*. 2020; 18(1):49–51. Epub 20200124. <https://doi.org/10.1176/appi.focus.20190041> PMID: 32047398.
29. Pumariega AJ, Rogers K, Rothe E. Culturally Competent Systems of Care for Children's Mental Health: Advances and Challenges. *Community Ment Health J*. 2005; 41(5):539–55. <https://doi.org/10.1007/s10597-005-6360-4> PMID: 16142537
30. Jackson KF. Building cultural competence: A systematic evaluation of the effectiveness of culturally sensitive interventions with ethnic minority youth. *Child Youth Serv Rev*. 2009; 31(11):1192–8. <https://doi.org/10.1016/j.childyouth.2009.08.001>
31. Cauce AM, Domenech-Rodríguez M, Paradise M, Cochran BN, Shea JM, Srebnik D, et al. Cultural and contextual influences in mental health help seeking: A focus on ethnic minority youth. *J Consult Clin Psychol*. 2002; 70(1):44–55. <https://doi.org/10.1037//0022-006x.70.1.44> PMID: 11860055
32. McCabe E, Amarbayan MM, Rabi S, Mendoza J, Naqvi SF, Thapa Bajgain K, et al. Youth engagement in mental health research: A systematic review. *Health Expect*. 2023; 26(1):30–50. Epub 20221116. <https://doi.org/10.1111/hex.13650> PMID: 36385452.
33. Hahm HC, Chang ST, Tong HQ, Meneses MA, Yuzbasioglu RF, Hien D. Intersection of suicidality and substance abuse among young Asian-American women: Implications for developing interventions in young adulthood. *Adv Dual Diagn*. 2014; 7(2):90–104. <https://doi.org/10.1108/ADD-03-2014-0012> PMID: 25031627.
34. Huey S, Tilley J. Effects of Mental Health Interventions with Asian Americans: A Review and Meta-Analysis. *J Consult Clin Psychol*. 2018; 86:915–30. <https://doi.org/10.1037/ccp0000346> PMID: 30335424
35. Appel H, D. Nguyen P, Bang K. Eliminating racial and ethnic disparities in behavioral healthcare in the United States. *Journal of Health Inequalities*. 2021; 7(1):52–6. <https://doi.org/10.5114/jhi.2021.107008>
36. Dong SY, Nguyen L, Cross A, Doherty-Kirby A, Geboers J, McCauley D, et al. Youth engagement in research: exploring training needs of youth with neurodevelopmental disabilities. *Research Involv*. 2023; 9(1):50. <https://doi.org/10.1186/s40900-023-00452-3> PMID: 37430378
37. Hawke LD, Mehra K, Settipani C, Relihan J, Darnay K, Chaim G, et al. What makes mental health and substance use services youth friendly? A scoping review of literature. *BMC Health Services Research*. 2019; 19(1):257. <https://doi.org/10.1186/s12913-019-4066-5> PMID: 31029109
38. Hart RA. Children's participation: From tokenism to citizenship. 1992.
39. Crystal D. Asian Americans and the Myth of the Model Minority. *Social Casework*. 1989; 70(7):405–13. <https://doi.org/10.1177/104438948907000702>
40. Kim E, Taylor K. The Model Minority Stereotype as a Prescribed Guideline of Empire: Situating the Model Minority Research in the Postcolonial Context. *J Southeast Asian Am Educ Adv*. 2017; 12. <https://doi.org/10.7771/2153-8999.1156>
41. Lee JH. 15.7 The Model Minority and Its Impact on Asian American Development: A Literature Review. *J Am Acad Child Adolesc Psychiatry*. 2021; 60(10):S188–S9. <https://doi.org/10.1016/j.jaac.2021.09.170>
42. Kim JY. Are Asians Black?: The Asian-American Civil Rights Agenda and the Contemporary Significance of the Black/White Paradigm. *Yale L.J*. 1999; 108(8):2385–412. <https://doi.org/10.2307/797390>
43. Shih KY, Chang T-F, Chen S-Y. Impacts of the Model Minority Myth on Asian American Individuals and Families: Social Justice and Critical Race Feminist Perspectives. *J Fam Theory Rev*. 2019; 11(3):412–28. <https://doi.org/10.1111/jftr.12342>
44. Spencer MS, Chen J, Gee GC, Fabian CG, Takeuchi DT. Discrimination and mental health-related service use in a national study of Asian Americans. *Am J Public Health*. 2010; 100(12):2410–7. Epub 20100318. <https://doi.org/10.2105/ajph.2009.176321> PMID: 20299649.

45. Kramer EJ, Kwong K, Lee E, Chung H. Cultural factors influencing the mental health of Asian Americans. *West J Med.* 2002; 176(4):227–31. PMID: [12208826](#).
46. Altweck L, Marshall TC, Ferenczi N, Lefringhausen K. Mental health literacy: a cross-cultural approach to knowledge and beliefs about depression, schizophrenia and generalized anxiety disorder. *Front Psychol.* 2015; 6:1272. Epub 20150908. <https://doi.org/10.3389/fpsyg.2015.01272> PMID: [26441699](#).
47. Tse S, Ng RMK. Applying a Mental Health Recovery Approach for People from Diverse Backgrounds: The Case of Collectivism and Individualism Paradigms. *J Psychos Rehabilitation and Mental Health.* 2014; 1(1):7–13. <https://doi.org/10.1007/s40737-014-0010-5>
48. Alden DL, Friend J, Lee PY, Lee YK, Trevena L, Ng CJ, et al. Who Decides: Me or We? Family Involvement in Medical Decision Making in Eastern and Western Countries. *Med DeciS Making.* 2018; 38(1):14–25. <https://doi.org/10.1177/0272989X17715628> PMID: [28691551](#).
49. Samari E, Teh WL, Roystonn K, Devi F, Cetty L, Shahwan S, et al. Perceived mental illness stigma among family and friends of young people with depression and its role in help-seeking: a qualitative inquiry. *BMC Psychiatry.* 2022; 22(1):107. <https://doi.org/10.1186/s12888-022-03754-0> PMID: [35144565](#)
50. Chen FP, Lai GY, Yang L. Mental illness disclosure in Chinese immigrant communities. *J Couns Psychol.* 2013; 60(3):379–91. Epub 20130506. <https://doi.org/10.1037/a0032620> PMID: [23647389](#).
51. Kormendi NM, Brown AD. Asian American mental health during COVID-19: A call for task-sharing interventions. *SSM Ment Health.* 2021; 1:100006. Epub 20210617. <https://doi.org/10.1016/j.ssmmh.2021.100006> PMID: [34494013](#).
52. Bith-Melander P, Chowdhury N, Jindal C, Efrid JT. Trauma Affecting Asian-Pacific Islanders in the San Francisco Bay Area. *Int J Environ Res Public Health.* 2017; 14(9). Epub 20170912. <https://doi.org/10.3390/ijerph14091053> PMID: [28895918](#).
53. Saich T. The Cultural Revolution and its aftermath. In: Saich T, editor. *China: Politics and Government*. London: Macmillan Education UK; 1981. p. 45–71.
54. National Alliance on Mental Illness. Expectations and Family Pressure Virginia, US: NAMI; [cited 2023]. <https://www.nami.org/Your-Journey/Identity-and-Cultural-Dimensions/Asian-American-and-Pacific-Islander/Expectations-and-Family-Pressure>.
55. Cai J, Lee RM. Intergenerational Communication about Historical Trauma in Asian American Families. *Advers Resil Sci.* 2022; 3(3):233–45. Epub 20220607. <https://doi.org/10.1007/s42844-022-00064-y> PMID: [35692379](#).
56. Chou F, Buchanan MJ, McDonald M, Westwood M, Huang C. Narrative themes of Chinese Canadian intergenerational trauma: offspring perspectives of trauma transmission. *Couns Psychol Q.* 2023; 36(2):321–49. <https://doi.org/10.1080/09515070.2022.2093165>
57. Sangalang CC, Vang C. Intergenerational Trauma in Refugee Families: A Systematic Review. *J Immigr Minor Health.* 2017; 19(3):745–54. <https://doi.org/10.1007/s10903-016-0499-7> PMID: [27659490](#).
58. Misra S, Kwon SC, Abraído-Lanza AF, Chebli P, Trinh-Shevrin C, Yi SS. Structural Racism and Immigrant Health in the United States. *Health Educ Behav.* 2021; 48(3):332–41. <https://doi.org/10.1177/10901981211010676> PMID: [34080482](#).
59. Chen S-Y, Chang T-F, Shih KY. Model Minority Stereotype: Addressing Impacts of Racism and Inequities on Asian American Adolescents Development. *J Child Adolesc Couns.* 2021; 7(2):118–31. <https://doi.org/10.1080/23727810.2021.1955544>
60. Hoang Kay K. How the history of spas and sex work fits into the conversation about the Atlanta shootings. *Vox.* 2021
61. Gover AR, Harper SB, Langton L. Anti-Asian Hate Crime During the COVID-19 Pandemic: Exploring the Reproduction of Inequality. *Am J Crim Justice.* 2020; 45(4):647–67. Epub 20200707. <https://doi.org/10.1007/s12103-020-09545-1> PMID: [32837171](#).
62. Jan A. Mental health impact of discrimination toward Asian Americans during the COVID pandemic. *Asian J Psychiatr.* 2021; 63:102764. Epub 20210713. <https://doi.org/10.1016/j.ajp.2021.102764> PMID: [34274627](#).
63. Ermis-Demirtas H, Luo Y, Huang Y-J. The Impact of COVID-19-Associated Discrimination on Anxiety and Depression Symptoms in Asian American Adolescents. *Int Perspect Psychol.* 2022; 11(3):153–60. <https://doi.org/10.1027/2157-3891/a000049>
64. Mongelli F, Georgakopoulos P, Pato MT. Challenges and Opportunities to Meet the Mental Health Needs of Underserved and Disenfranchised Populations in the United States. *Focus (Am Psychiatr Publ).* 2020; 18(1):16–24. Epub 20200124. <https://doi.org/10.1176/appi.focus.20190028> PMID: [32047393](#).

65. National Research Council (US), Institute of Medicine (US) Committee on the Health and Adjustment of Immigrant Children and Families. The National Academies Collection: Reports funded by National Institutes of Health. In: Hernandez DJ, Charney E, editors. *From Generation to Generation: The Health and Well-Being of Children in Immigrant Families*. Washington (DC): National Academies Press (US) Copyright 1998 by the National Academy of Sciences. All rights reserved.; 1998.
66. Pritchard C, Wallace MS. Comparing the USA, UK and 17 Western countries' efficiency and effectiveness in reducing mortality. *JRSM Short Rep*. 2011; 2(7):60. Epub 20110720. <https://doi.org/10.1258/shorts.2011.011076> PMID: 21847442.
67. Khan J, Rundle-Thiele S, Rivers G. Insights into chinese diets: A social marketing formative study. 2018. p. 251–66.
68. Wilson MC, Knutsen CH. Geographical Coverage in Political Science Research. *Perspect Politics*. 2022; 20(3):1024–39. Epub 2020/10/05. <https://doi.org/10.1017/S1537592720002509>
69. Chauvel L, Bar Haim E, Hartung A, Murphy E. Rewealthization in twenty-first century Western countries: the defining trend of the socioeconomic squeeze of the middle class. *J Chin Sociol*. 2021; 8(1):4. <https://doi.org/10.1186/s40711-020-00135-6> PMID: 35822199
70. Azzam A. Is the world converging to a 'Western diet'? *Public Health Nutr*. 2021; 24(2):309–17. Epub 2020/10/20. <https://doi.org/10.1017/S136898002000350X> PMID: 33077024
71. Young MT, Pebley AR. Legal Status, Time in the USA, and the Well-Being of Latinos in Los Angeles. *J Urban Health*. 2017; 94(6):764–75. <https://doi.org/10.1007/s11524-017-0197-3> PMID: 28875414.
72. Mitchell T, Weinberg M, Posey DL, Cetron M. Immigrant and Refugee Health: A Centers for Disease Control and Prevention Perspective on Protecting the Health and Health Security of Individuals and Communities During Planned Migrations. *Pediatr Clin North Am*. 2019; 66(3):549–60. <https://doi.org/10.1016/j.pcl.2019.02.004> PMID: 31036234.
73. Martinez O, Wu E, Sandfort T, Dodge B, Carballo-Diequez A, Pinto R, et al. Evaluating the impact of immigration policies on health status among undocumented immigrants: a systematic review. *J Immigr Minor Health*. 2015; 17(3):947–70. <https://doi.org/10.1007/s10903-013-9968-4> PMID: 24375382.
74. Rumbaut RG. Ages, Life Stages, and Generational Cohorts: Decomposing the Immigrant First and Second Generations in the United States. *Int Migr Rev*. 2004; 38(3):1160–205.
75. Duncan B, Trejo SJ. The Complexity of Immigrant Generations: Implications for Assessing the Socio-economic Integration of Hispanics and Asians. *Ind Labor Relat Rev*. 2017; 70(5):1146–75. Epub 20161112. <https://doi.org/10.1177/0019793916679613> PMID: 28935997.
76. Lopez M, Ruiz MO, Rovnaghi CR, Tam GK, Hiscox J, Gotlib IH, et al. The social ecology of childhood and early life adversity. *Pediatr Res*. 2021; 89(2):353–67. Epub 20210118. <https://doi.org/10.1038/s41390-020-01264-x> PMID: 33462396.
77. Bronfenbrenner U. *The ecology of human development: Experiments by nature and design*: Harvard University press; 1979.
78. Bronfenbrenner U, Morris PA, Damon W, Lerner RM. *Handbook of child psychology. Theoretical models of human development*. 1998; 1:993–1028.
79. Navarro JL, Stephens C, Rodrigues BC, Walker IA, Cook O, O'Toole L, et al. Bored of the rings: Methodological and analytic approaches to operationalizing Bronfenbrenner's PPCT model in research practice. *Journal Fam Theory Rev*. 2022; 14(2):233–53. <https://doi.org/10.1111/jftr.12459>
80. Xia M, Li X, Tudge J. Operationalizing Urie Bronfenbrenner's Process-Person-Context-Time Model. *Hum Dev*. 2020; 64:1–11. <https://doi.org/10.1159/000507958>
81. Tudge JRH, Merçon-Vargas EA, Payir A. Urie Bronfenbrenner's Bioecological Theory: Its Development, Core Concepts, and Critical Issues. In: Adamsons K, Few-Demo AL, Proulx C, Roy K, editors. *Sourcebook of Family Theories and Methodologies: A Dynamic Approach*. Cham: Springer International Publishing; 2022. p. 235–54.
82. Levesque J-F, Harris MF, Russell G. Patient-centred access to health care: conceptualising access at the interface of health systems and populations. *Int J Equity Health*. 2013; 12(1):18. <https://doi.org/10.1186/1475-9276-12-18> PMID: 23496984
83. El Zaatari W, Maalouf I. How the Bronfenbrenner Bio-ecological System Theory Explains the Development of Students' Sense of Belonging to School? *SAGE Open*. 2022; 12(4):21582440221134089. <https://doi.org/10.1177/21582440221134089>
84. Waugh M, Guhn M. Bioecological Theory of Human Development. In: Michalos AC, editor. *Encyclopedia of Quality of Life and Well-Being Research*. Dordrecht: Springer Netherlands; 2014. p. 398–401.
85. Navarro JL, Tudge JRH. Technologizing Bronfenbrenner: Neo-ecological Theory. *Curr Psychol*. 2022:1–17. Epub 20220121. <https://doi.org/10.1007/s12144-022-02738-3> PMID: 35095241.

86. Wu Q, Guo S, Evans CB, Smokowski PR, Bacallao M, Stalker KC. Modeling ecological risk, health promotion, and prevention program effects for rural adolescents. *J Soc Soc Work Res.* 2019; 10(1):35–68.
87. Arksey H, O'Malley L. Scoping studies: towards a methodological framework. *Int J Soc Res Methodol.* 2005; 8(1):19–32. <https://doi.org/10.1080/1364557032000119616>
88. Nesbitt AE, Sabiston CM, deJonge ML, Barbic SP, Kozloff N, Nalder EJ. A scoping review of resilience among transition-age youth with serious mental illness: Tensions, knowledge gaps, and future directions. *BMC Psychiatry.* 2023; 23(1):660. <https://doi.org/10.1186/s12888-023-05158-0> PMID: 37679708
89. Peters MG, C; McInerney, P. Reviewer's Manual 2019 [cited 2023 August 31]. <https://jbi-global-wiki.refined.site/space/MANUAL/4687737>.
90. Peters MD, Godfrey C, McInerney P, Munn Z, Tricco AC, Khalil H. Scoping reviews. Joanna Briggs Institute reviewer's manual. 2017; 2015:1–24.
91. Tsai-Chae AH, Nagata DK. Asian values and perceptions of intergenerational family conflict among Asian American students. *Cultur Divers Ethnic Minor Psychol.* 2008; 14(3):205. <https://doi.org/10.1037/1099-9809.14.3.205> PMID: 18624585
92. Juang LP, Syed M, Takagi M. Intergenerational discrepancies of parental control among Chinese American families: Links to family conflict and adolescent depressive symptoms. *J Adolesc.* 2007; 30(6):965–75. Epub 20070313. <https://doi.org/10.1016/j.adolescence.2007.01.004> PMID: 17360033.
93. Ying YW, Han M. The longitudinal effect of intergenerational gap in acculturation on conflict and mental health in Southeast Asian American adolescents. *Am J Orthopsychiatry.* 2007; 77(1):61–6. <https://doi.org/10.1037/0002-9432.77.1.61> PMID: 17352586.
94. Zenone MA, Cianfrone M, Sharma R, Majid S, Rakhra J, Cruz K, et al. Supporting youth 12–24 during the COVID-19 pandemic: how Foundry is mobilizing to provide information, resources and hope across the province of British Columbia. *Glob Health Promot.* 2021; 28(1):51–9. Epub 20210218. <https://doi.org/10.1177/1757975920984196> PMID: 33601961.
95. Howe D, Batchelor S, Coates D, Cashman E. Nine key principles to guide youth mental health: development of service models in New South Wales. *Early Interv Psychiatry.* 2014; 8(2):190–7. Epub 20131120. <https://doi.org/10.1111/eip.12096> PMID: 24251956.
96. Hamwey M, Allen L, Hay M, Varpio L. Bronfenbrenner's Bioecological Model of Human Development: Applications for Health Professions Education. *Acad Med.* 2019; 94(10):1621. <https://doi.org/10.1097/ACM.0000000000002822> PMID: 31192804.
97. Anderson JK, Howarth E, Vainre M, Humphrey A, Jones PB, Ford TJ. Advancing methodology for scoping reviews: recommendations arising from a scoping literature review (SLR) to inform transformation of Children and Adolescent Mental Health Services. *BMC Med Res Methodol.* 2020; 20(1):242. Epub 20200929. <https://doi.org/10.1186/s12874-020-01127-3> PMID: 32993505.
98. Munn Z, Peters MDJ, Stern C, Tufanaru C, McArthur A, Aromataris E. Systematic review or scoping review? Guidance for authors when choosing between a systematic or scoping review approach. *BMC Med Res Methodol.* 2018; 18(1):143. <https://doi.org/10.1186/s12874-018-0611-x> PMID: 30453902
99. Forman J, Damschroder L. Qualitative content analysis. *Empirical methods for bioethics: A primer*: Emerald Group Publishing Limited; 2007. p. 39–62.
100. Elo S, Kyngäs H. The qualitative content analysis process. *J Adv Nurs.* 2008; 62(1):107–15. <https://doi.org/10.1111/j.1365-2648.2007.04569.x> PMID: 18352969
101. Tricco AC, Lillie E, Zarin W, O'Brien KK, Colquhoun H, Levac D, et al. PRISMA Extension for Scoping Reviews (PRISMA-ScR): Checklist and Explanation. *Ann Intern Med.* 2018; 169(7):467–73. <https://doi.org/10.7326/M18-0850> PMID: 30178033
102. Smith S. Encouraging the use of reflexivity in the writing up of qualitative research. *International Journal of Therapy and Rehabilitation.* 2006; 13(5):209–15. <https://doi.org/10.12968/ijtr.2006.13.5.21377>
103. Engward H, Davis G. Being reflexive in qualitative grounded theory: discussion and application of a model of reflexivity. *J Adv Nurs.* 2015; 71(7):1530–8. <https://doi.org/10.1111/jan.12653> PMID: 25825257
104. Watt D. On Becoming a Qualitative Researcher: The Value of Reflexivity. *The Qualitative Report.* 2015. <https://doi.org/10.46743/2160-3715/2007.1645>
105. Goldblatt H, Band-Winterstein T. From understanding to insight: using reflexivity to promote students' learning of qualitative research. *Reflective Pract.* 2016; 17(2):100–13.
106. Rettke H, Pretto M, Spichiger E, Frei IA, Spirig R. Using reflexive thinking to establish rigor in qualitative research. *Nurs Res.* 2018; 67(6):490–7. <https://doi.org/10.1097/NNR.0000000000000307> PMID: 30067583

107. Jamieson MK, Govaart GH, Pownall M. Reflexivity in quantitative research: A rationale and beginner's guide. *Soc Personal Psychol Compass*. 2023; 17(4):e12735. <https://doi.org/10.1111/spc3.12735>
108. Wu T-Y, Lee J. A Pilot Program to Promote Mental Health among Asian-American Immigrant Children and their Parents: A Community-Based Participatory Approach. *International Journal of Child, Youth and Family Studies*. 2015; 6(4–1):730–45. <https://doi.org/10.18357/ijcyfs.641201515055>
109. Choi NY, Miller MJ. AAPI college students' willingness to seek counseling: the role of culture, stigma, and attitudes. *J Couns Psychol*. 2014; 61(3):340–51. <https://doi.org/10.1037/cou0000027> PMID: 25019538.
110. Kim P, Lee D. Internalized Model Minority Myth, Asian Values, and Help-Seeking Attitudes Among Asian American Students. *Cultural Divers Ethnic Minor Psychol*. 2013; 20. <https://doi.org/10.1037/a0033351> PMID: 23914745
111. Cheng AW, Chang J, O'Brien J, Budgazad MS, Tsai J. Model Minority Stereotype: Influence on Perceived Mental Health Needs of Asian Americans. *J Immigr Minor Health*. 2017; 19(3):572–81. <https://doi.org/10.1007/s10903-016-0440-0> PMID: 27246287.
112. Collier AF, Munger M, Moua YK. Hmong mental health needs assessment: a community-based partnership in a small mid-Western community. *Am J Community Psychol*. 2012; 49(1–2):73–86. <https://doi.org/10.1007/s10464-011-9436-z> PMID: 21519936.
113. Lee S, Jang Y. Factors Associated with Willingness to Use Mental Health Services in Korean Immigrants. *Soc Work Public Health*. 2016; 31(3):196–203. Epub 20160316. <https://doi.org/10.1080/19371918.2015.1125319> PMID: 26984783.
114. Lee S, Juon HS, Martinez G, Hsu CE, Robinson ES, Bawa J, et al. Model minority at risk: expressed needs of mental health by Asian American young adults. *J Community Health*. 2009; 34(2):144–52. <https://doi.org/10.1007/s10900-008-9137-1> PMID: 18931893.
115. Mallinckrodt B, Shigeoka S, Suzuki LA. Asian and Pacific Island American students' acculturation and etiology beliefs about typical counseling presenting problems. *Cultur Divers Ethnic Minor Psychol*. 2005; 11(3):227–38. <https://doi.org/10.1037/1099-9809.11.3.227> PMID: 16117590.
116. Meyer O, Zane N, Cho YI. Understanding the psychological processes of the racial match effect in Asian Americans. *J Couns Psychol*. 2011; 58(3):335–45. <https://doi.org/10.1037/a0023605> PMID: 21574698.
117. Yeh M, Takeuchi DT, Sue S. Asian-American children treated in the mental health system: A comparison of parallel and mainstream outpatient service centers. *J Clin Child Psychol*. 1994; 23(1):5–12. [https://doi.org/10.1207/s15374424jccp2301\\_2](https://doi.org/10.1207/s15374424jccp2301_2)
118. Masson CL, Shopshire MS, Sen S, Hoffman KA, Hengl NS, Bartolome J, et al. Possible barriers to enrollment in substance abuse treatment among a diverse sample of Asian Americans and Pacific Islanders: opinions of treatment clients. *J Subst Abuse Treat*. 2013; 44(3):309–15. Epub 20120915. <https://doi.org/10.1016/j.jsat.2012.08.005> PMID: 22985677.
119. Omizo MM, Kim BSK, Abel NR. Asian and European American Cultural Values, Bicultural Competence, and Attitudes Toward Seeking Professional Psychological Help Among Asian American Adolescents. *Journal of Multicultural Counseling and Development*. 2008; 36(1):15–28. <https://doi.org/10.1002/j.2161-1912.2008.tb00066.x>
120. Thikey M, Florin P, Ng C. Help Seeking Attitudes Among Cambodian and Laotian Refugees: Implications for Public Mental Health Approaches. *J Immigr Minor Health*. 2015; 17(6):1679–86. <https://doi.org/10.1007/s10903-015-0171-7> PMID: 25672994.
121. Ting JY, Hwang WC. Cultural influences on help-seeking attitudes in Asian American students. *Am J Orthopsychiatry*. 2009; 79(1):125–32. <https://doi.org/10.1037/a0015394> PMID: 19290732.
122. Wang C, Marsico KF, Do KA. Asian American Parents' Beliefs About Helpful Strategies for Addressing Adolescent Mental Health Concerns at Home and School. *School Ment Health*. 2020; 12(3):523–36. <https://doi.org/10.1007/s12310-020-09362-1>
123. Wong CC. Examining barriers and facilitators to professional mental health help-seeking in Asian American youth: University of Washington; 2006.
124. Wong EC, Collins RL, Cerully JL, Yu JW, Seelam R. Effects of contact-based mental illness stigma reduction programs: age, gender, and Asian, Latino, and White American differences. *Soc Psychiatry Psychiatr Epidemiol*. 2018; 53(3):299–308. Epub 20171202. <https://doi.org/10.1007/s00127-017-1459-9> PMID: 29196773.
125. Wong J, Brownson C, Rutkowski L, Nguyen CP, Becker MS. A mediation model of professional psychological help seeking for suicide ideation among Asian American and white American college students. *Arch Suicide Res*. 2014; 18(3):259–73. <https://doi.org/10.1080/13811118.2013.824831> PMID: 24620900.



126. Wong YJ, Tran KK, Kim SH, Van Horn Kerne V, Calfa NA. Asian Americans' lay beliefs about depression and professional help seeking. *J Clin Psychol*. 2010; 66(3):317–32. <https://doi.org/10.1002/jclp.20653> PMID: 20127962.
127. Yee T, Ceballos P, Diaz J. Examining the Psychological Help-Seeking Attitudes of Chinese Immigrants in the U.S. *Int J Adv Couns*. 2020; 42(3):307–18. <https://doi.org/10.1007/s10447-020-09403-z>
128. Gamst G, Aguilar-Kitibutr A, Herdina A, Hibbs S, Krishtal E, Lee R, et al. Effects of racial match on Asian American mental health consumer satisfaction. *Ment Health Serv Res*. 2003; 5(4):197–208. <https://doi.org/10.1023/a:1026224901243> PMID: 14672499.
129. Li H, Friedman-Yakoobian M, Min G, Granato AG, Seidman LJ. Working with Asian American youth at clinical high risk for psychosis: a case illustration. *J Nerv Ment Dis*. 2013; 201(6):484–9. <https://doi.org/10.1097/NMD.0b013e3182948084> PMID: 23689196.
130. Ngo-Metzger Q, Legedza AT, Phillips RS. Asian Americans' reports of their health care experiences. Results of a national survey. *J Gen Intern Med*. 2004; 19(2):111–9. <https://doi.org/10.1111/j.1525-1497.2004.30143.x> PMID: 15009790.
131. Anyon Y, Ong S, Whitaker K. School-Based Mental Health Prevention for Asian American Adolescents: Risk Behaviors, Protective Factors, and Service Use. *Asian Am J Psychol*. 2014; 5:134–44. <https://doi.org/10.1037/a0035300>
132. Kim JE, Zane N. Help-seeking intentions among Asian American and White American students in psychological distress: Application of the health belief model. *Cultur Divers Ethnic Minor Psychol*. 2016; 22(3):311–21. Epub 20150622. <https://doi.org/10.1037/cdp0000056> PMID: 26098454.
133. Kim PY, Kendall DL. Etiology beliefs moderate the influence of emotional self-control on willingness to see a counselor through help-seeking attitudes among Asian American students. *J Couns Psychol*. 2015; 62(2):148–58. Epub 20140317. <https://doi.org/10.1037/cou0000015> PMID: 24635590.
134. Yang KG, Rodgers CRR, Lee E, Lê Cook B. Disparities in Mental Health Care Utilization and Perceived Need Among Asian Americans: 2012–2016. *Psychiatr Serv*. 2019; 71(1):21–7. <https://doi.org/10.1176/appi.ps.201900126> PMID: 31575351
135. Park C, Loy JH, Lillis S, Menkes DB. What stops Korean immigrants from accessing child and adolescent mental health services? *Child Adolesc Psychiatry Ment Health*. 2022; 16(1):19. <https://doi.org/10.1186/s13034-022-00455-0> PMID: 35241121
136. Sudhinaraset M, Ling I, To TM, Melo J, Quach T. Dreams deferred: Contextualizing the health and psychosocial needs of undocumented Asian and Pacific Islander young adults in Northern California. *Soc Sci Med*. 2017; 184:144–52. Epub 20170510. <https://doi.org/10.1016/j.socscimed.2017.05.024> PMID: 28527372.
137. Ling A, Okazaki S, Tu M-C, Kim JJ. Challenges in Meeting the Mental Health Needs of Urban Asian American Adolescents: Service Providers' Perspectives. *Race Soc Probl*. 2014; 6(1):25–37. <https://doi.org/10.1007/s12552-014-9117-2>
138. Abe-Kim J, Takeuchi D, Hwang WC. Predictors of help seeking for emotional distress among Chinese Americans: family matters. *J Consult Clin Psychol*. 2002; 70(5):1186–90. PMID: 12362969.
139. Arora P, Algios A. School-Based Mental Health for Asian American Immigrant Youth: Perceptions and Recommendations. *Asian Am J Psychol*. 2018; 10. <https://doi.org/10.1037/aap0000142>
140. Chang J, Natsuaki MN, Chen CN. The importance of family factors and generation status: mental health service use among Latino and Asian Americans. *Cultur Divers Ethnic Minor Psychol*. 2013; 19(3):236–47. <https://doi.org/10.1037/a0032901> PMID: 23875849.
141. Kim JM. Structural Family Therapy and its Implications for the Asian American Family. *Family J*. 2003; 11(4):388–92. <https://doi.org/10.1177/1066480703255387>
142. Kodish T, Weiss B, Duong J, Rodriguez A, Anderson G, Nguyen H, et al. Interpersonal Psychotherapy—Adolescent Skills Training With Youth From Asian American and Immigrant Families: Cultural Considerations and Intervention Process. *Cogn Behav Pract*. 2021; 28(2):147–66. <https://doi.org/10.1016/j.cbpra.2020.05.009> PMID: 35422577
143. Chiang S, Chin CA, Meyer EW, Sust S, Chu J. Asian American adolescent help-seeking pathways for psychological distress. *Asian American Journal of Psychology*. 2022; 13(2):194.
144. Lee AS, editor Family social networks and mental health service use among Vietnamese-Americans in multigenerational families. 2015.
145. Jeong YM, McCreary LL, Hughes TL. Qualitative Study of Depression Literacy Among Korean American Parents of Adolescents. *J Psychosoc Nurs Ment Health Serv*. 2018; 56(1):48–56. Epub 20171009. <https://doi.org/10.3928/02793695-20170929-03> PMID: 28990637.
146. Yasui M, Choi Y, Chin M, Miranda Samuels G, Kim K, Victorson D. Parental socialization of mental health in Chinese American families: What parents say and do, and how youth make meaning. *Fam Process*. 2023; 62(1):319–35. <https://doi.org/10.1111/famp.12766> PMID: 35322420

147. Arora PG, Khoo O. Sources of stress and barriers to mental health service use among Asian immigrant-origin youth: A qualitative exploration. *J Child Fam Stud*. 2020; 29(9):2590–601. <https://doi.org/10.1007/s10826-020-01765-7>
148. Coffey D, Sepulveda A, David J, Lopez H, Bantol K, Castro J, et al. Creating a shared definition of adolescent mental health in the Filipino American community: A comparative focus group analysis. *Asian Am J Psychol*. 2022; 13:112–28. <https://doi.org/10.1037/aap0000240>
149. Fang L, Schinke SP. Two-year outcomes of a randomized, family-based substance use prevention trial for Asian American adolescent girls. *Psychol Addict Behav*. 2013; 27(3):788–98. Epub 20121231. <https://doi.org/10.1037/a0030925> PMID: 23276322.
150. Wang C, Liu JL, Do KA, Shao X, Lu H. Chapter 3—Engaging parents to promote mental health among Chinese American youth. In: Breland-Noble AM, editor. *Community Mental Health Engagement with Racially Diverse Populations*: Academic Press; 2020. p. 49–82.
151. Wang C, Shao X, Do KA, Lu HK, O’Neal CR, Zhang Y. Using Participatory Culture-Specific Consultation with Asian American Communities: Identifying Challenges and Solutions for Asian American Immigrant Families. *J Educ Psychol Consult*. 2021; 31(1):17–38. <https://doi.org/10.1080/10474412.2019.1614453>
152. Pak N. *Cultural Adaptation of a Prevention Program of Korean American Parents of Adolescents* Fairfax, VA: George Mason University 2022.
153. Javier JR, Supan J, Lansang A, Beyer W, Kubicek K, Palinkas LA. Preventing Filipino Mental Health Disparities: Perspectives from Adolescents, Caregivers, Providers, and Advocates. *Asian Am J Psychol*. 2014; 5(4):316–24. <https://doi.org/10.1037/a0036479> PMID: 25667725.
154. Anyon Y, Whitaker K, Shields JP, Franks H. Help-seeking in the school context: understanding Chinese American adolescents’ underutilization of school health services. *J Sch Health*. 2013; 83(8):562–72. <https://doi.org/10.1111/josh.12066> PMID: 23834608.
155. Davis RF, Kiang L. Religious Identity, Religious Participation, and Psychological Well-Being in Asian American Adolescents. *J Youth Adolesc*. 2016; 45(3):532–46. Epub 20150907. <https://doi.org/10.1007/s10964-015-0350-9> PMID: 26346036.
156. Goodkind JR. Effectiveness of a community-based advocacy and learning program for hmong refugees. *Am J Community Psychol*. 2005; 36(3–4):387–408. <https://doi.org/10.1007/s10464-005-8633-z> PMID: 16389507.
157. Liu JL, Wang C, Do KA, Bali D. Asian American adolescents’ mental health literacy and beliefs about helpful strategies to address mental health challenges at school. *Psychol Sch*. 2022; 59(10):2062–84. <https://doi.org/10.1002/pits.22655>
158. Yee TT, Lee RH. Based on cultural strengths, a school primary prevention program for Asian-American youth. *Community Ment Health J*. 1977; 13(3):239–48. <https://doi.org/10.1007/BF02161198> PMID: 913081
159. Huynh Q-L, Devos T, Smalarz L. Perpetual Foreigner in One’s Own Land: Potential Implications for Identity and Psychological Adjustment. *J Soc Clin Psychol*. 2011; 30(2):133–62. <https://doi.org/10.1521/jscp.2011.30.2.133> PMID: 21572896
160. Wang C, Liu JL, Marsico KF, Zhu Q. Culturally adapting youth mental health first aid training for Asian Americans. *Psychol Serv*. 2022; 19(3):551–61. Epub 20210722. <https://doi.org/10.1037/ser0000574> PMID: 34292006.
161. Havewala M, Wang C, Bali D, Chronis-Tuscano A. Evaluation of the Virtual Youth Mental Health First Aid Training for Asian Americans During COVID-19. *Evid Based Pract in Child Adolesc Ment Health*. 2022:1–14. <https://doi.org/10.1080/23794925.2022.2111727>
162. Wu E, Torous J, Liu C. Chinese immigrant use of smartphone apps toward improving child mental health awareness and resource delivery: A pilot study. *Asian J Psychiatr*. 2018; 33:1–6. Epub 20171216. <https://doi.org/10.1016/j.ajp.2017.12.007> PMID: 29289856.
163. Aratani Y, Liu CH. English Proficiency, Threshold Language Policy and Mental Health Service Utilization among Asian-American Children. *Arch Psychiatr Nurs*. 2015; 29(5):326–32. Epub 20150618. <https://doi.org/10.1016/j.apnu.2015.06.006> PMID: 26397437.
164. Lee SY, Martins SS, Keyes KM, Lee HB. Mental health service use by persons of Asian ancestry with DSM-IV mental disorders in the United States. *Psychiatr Serv*. 2011; 62(10):1180–6. [https://doi.org/10.1176/ps.62.10.pss6210\\_1180](https://doi.org/10.1176/ps.62.10.pss6210_1180) PMID: 21969644.
165. Liu CH, Meeuwesen L, van Wesel F, Ingleby D. Why do ethnic Chinese in the Netherlands underutilize mental health care services? Evidence from a qualitative study. *Transcult Psychiatry*. 2015; 52(3):331–52. Epub 20141202. <https://doi.org/10.1177/1363461514557887> PMID: 25468826.

166. Stern G, Cottrell D, Holmes J. Patterns of attendance of child psychiatry out-patients with special reference to Asian families. *Br J Psychiatry*. 1990; 156:384–7. <https://doi.org/10.1192/bjp.156.3.384> PMID: 2346839.
167. Abe-Kim J, Takeuchi DT, Hong S, Zane N, Sue S, Spencer MS, et al. Use of mental health-related services among immigrant and US-born Asian Americans: results from the National Latino and Asian American Study. *Am J Public Health*. 2007; 97(1):91–8. Epub 20061130. <https://doi.org/10.2105/AJPH.2006.098541> PMID: 17138905.
168. Brice C, Masia Warner C, Okazaki S, Ma PW, Sanchez A, Esseling P, et al. Social Anxiety and Mental Health Service Use Among Asian American High School Students. *Child Psychiatry Hum Dev*. 2015; 46(5):693–701. <https://doi.org/10.1007/s10578-014-0511-1> PMID: 25300193.
169. Chen AW, Kazanjian A, Wong H. Determinants of mental health consultations among recent Chinese immigrants in British Columbia, Canada: Implications for mental health risk and access to services. *J Immigr Minor Health*. 2008; 10(6):529–40. <https://doi.org/10.1007/s10903-008-9143-5> PMID: 18386178.
170. Choi NG, Kim J. Utilization of complementary and alternative medicines for mental health problems among Asian Americans. *Community Ment Health J*. 2010; 46(6):570–8. Epub 20100519. <https://doi.org/10.1007/s10597-010-9322-4> PMID: 20490674.
171. Javier JR, Lahiff M, Ferrer RR, Huffman LC. Examining depressive symptoms and use of counseling in the past year among Filipino and non-Hispanic white adolescents in California. *J Dev Behav Pediatr*. 2010; 31(4):295–303. <https://doi.org/10.1097/DBP.0b013e3181dbadc7> PMID: 20431400.
172. Lee SY, Martins SS, Lee HB. Mental disorders and mental health service use across Asian American subethnic groups in the United States. *Community Ment Health J*. 2015; 51(2):153–60. Epub 20140624. <https://doi.org/10.1007/s10597-014-9749-0> PMID: 24957253.
173. Sahker E, Yeung CW, Garrison YL, Park S, Arndt S. Asian American and Pacific Islander substance use treatment admission trends. *Drug Alcohol Depend*. 2017; 171:1–8. Epub 20161124. <https://doi.org/10.1016/j.drugalcdep.2016.11.022> PMID: 27988403.
174. Cho H, Kim I, Velez-Ortiz D. Factors associated with mental health service use among Latino and Asian Americans. *Community Ment Health J*. 2014; 50:960–7. <https://doi.org/10.1007/s10597-014-9719-6> PMID: 24659219
175. Jang Y, Yoon H, Park NS, Rhee MK, Chiriboga DA. Mental Health Service Use and Perceived Unmet Needs for Mental Health Care in Asian Americans. *Community Ment Health J*. 2019; 55(2):241–8. Epub 20181024. <https://doi.org/10.1007/s10597-018-0348-3> PMID: 30357724.
176. Wong A, Peiris-John R, Sobrun-Maharaj A, Ameratunga S. Priorities and approaches to investigating Asian youth health: perspectives of young Asian New Zealanders. *J Prim Health Care*. 2015; 7(4):282–90. Epub 20151201. <https://doi.org/10.1071/hc15282> PMID: 26668833.
177. Sangalang CC, Ngouy S, Lau AS. Using community-based participatory research to identify health issues for Cambodian American youth. *Fam Community Health*. 2015; 38(1):55–65. <https://doi.org/10.1097/FCH.000000000000056> PMID: 25423244.
178. McGarity-Palmer R, Saw A, Sun M, Huynh MP, Takeuchi D. Mental Health Needs Among Asian and Asian American Adults During the COVID-19 Pandemic. *Public Health Rep*. 2023; 138(3):535–45. Epub 20230327. <https://doi.org/10.1177/00333549231156566> PMID: 36971268.
179. Portes A, Zhou M. The New Second Generation: Segmented Assimilation and Its Variants. *Annals Am Acad Pol*. 1993; 530:74–96.
180. Waters MC, Tran VC, Kasinitz P, Mollenkopf JH. Segmented Assimilation Revisited: Types of Acculturation and Socioeconomic Mobility in Young Adulthood. *Ethn Racial Stud*. 2010; 33(7):1168–93. <https://doi.org/10.1080/01419871003624076> PMID: 20543888.
181. Hong S, Walton B, Kim HW, Rhee TG. Predicting the Behavioral Health Needs of Asian Americans in Public Mental Health Treatment: A Classification Tree Approach. *Adm Policy Ment Health*. 2023; 50(4):630–43. Epub 20230329. <https://doi.org/10.1007/s10488-023-01266-x> PMID: 36988832.
182. Fong TW, Tsuang J. Asian-americans, addictions, and barriers to treatment. *Psychiatry (Edgmont)*. 2007; 4(11):51–9. PMID: 20428303.
183. Lee S, Martinez G, Ma GX, Hsu CE, Robinson ES, Bawa J, et al. Barriers to health care access in 13 Asian American communities. *Am J Health Behav*. 2010; 34(1):21–30. <https://doi.org/10.5993/ajhb.34.1.3> PMID: 19663748.
184. Wynaden D, Chapman R, Orb A, McGowan S, Zeeman Z, Yeak S. Factors that influence Asian communities' access to mental health care. *Int J Ment Health Nurs*. 2005; 14(2):88–95. <https://doi.org/10.1111/j.1440-0979.2005.00364.x> PMID: 15896255.
185. Park M, Chesla CA, Rehm RS, Chun KM. Working with culture: culturally appropriate mental health care for Asian Americans. *J Adv Nurs*. 2011; 67(11):2373–82. <https://doi.org/10.1111/j.1365-2648.2011.05671.x> PMID: 21545638

186. Liang J, Matheson BE, Douglas JM. Mental Health Diagnostic Considerations in Racial/Ethnic Minority Youth. *J Child Fam Stud*. 2016; 25(6):1926–40. <https://doi.org/10.1007/s10826-015-0351-z> PMID: 27346929
187. Lu W, Todhunter-Reid A, Mitsdarffer ML, Muñoz-Laboy M, Yoon AS, Xu L. Barriers and Facilitators for Mental Health Service Use Among Racial/Ethnic Minority Adolescents: A Systematic Review of Literature. *Front Public Health*. 2021; 9. <https://doi.org/10.3389/fpubh.2021.641605> PMID: 33763401
188. Ai AL, Appel HB, Lee J, Fincham F. Family Factors Related to Three Major Mental Health Issues Among Asian-Americans Nationwide. *J Behav Health Serv Res*. 2022; 49(1):4–21. <https://doi.org/10.1007/s11414-021-09760-6> PMID: 34097207
189. Evans E, Pierce J, Li L, Rawson R, Hser YI. More alike than different: health needs, services utilization, and outcomes of Asian American and Pacific Islander (AAPI) populations treated for substance use disorders. *J Ethn Subst Abuse*. 2012; 11(4):318–38. <https://doi.org/10.1080/15332640.2012.735172> PMID: 23216439.
190. Lee M, Bhimla A, Lu W, Ma GX. Correlates of Mental Health Treatment Receipt Among Asian Americans with Perceived Mental Health Problems. *J Behav Health Serv Res*. 2021; 48(2):199–212. <https://doi.org/10.1007/s11414-020-09704-6> PMID: 32347427.
191. Savage JE, Mezuk B. Psychosocial and contextual determinants of alcohol and drug use disorders in the National Latino and Asian American Study. *Drug Alcohol Depend*. 2014; 139:71–8. Epub 20140319. <https://doi.org/10.1016/j.drugalcdep.2014.03.011> PMID: 24742864.
192. Yoon AS, Moon SS, Son H, An S, Jun JS, Jung S, et al. Understanding Korean Americans' Mental Health: A Guide to Culturally Competent Practices, Program Developments, and Policies: Lexington Books; 2021.
193. Cochran SD, Mays VM, Alegria M, Ortega AN, Takeuchi D. Mental health and substance use disorders among Latino and Asian American lesbian, gay, and bisexual adults. *J Consult Clin Psychol*. 2007; 75(5):785–94. <https://doi.org/10.1037/0022-006X.75.5.785> PMID: 17907860.
194. Substance Abuse and Mental Health Services Administration. Moving Beyond Change Efforts: Evidence and Action to Support and Affirm LGBTQI+ Youth Rockville, MD: 2023 SAMHSA Publication No. PEP22-03-12-001.
195. Matthews AK, Li CC, Bernhardt B, Sohani S, Dong XQ. Factors influencing the well-being of Asian American LGBT individuals across the lifespan: perspectives from leaders of community-based organizations. *BMC Geriatr*. 2022; 22(Suppl 1):909. Epub 20221128. <https://doi.org/10.1186/s12877-022-03590-7> PMID: 36443664.
196. Ching THW, Lee SY, Chen J, So RP, Williams MT. A model of intersectional stress and trauma in Asian American sexual and gender minorities. Educational Publishing Foundation; 2018. p. 657–68.
197. Becerra MB, Rodriguez EJ, Avina RM, Becerra BJ. Experiences of violence and mental health outcomes among Asian American transgender adults in the United States. *PLoS One*. 2021; 16(3):e0247812. Epub 20210304. <https://doi.org/10.1371/journal.pone.0247812> PMID: 33662045.
198. Yoshikawa H, Wilson PA, Chae DH, Cheng JF. Do family and friendship networks protect against the influence of discrimination on mental health and HIV risk among Asian and Pacific Islander gay men? *AIDS Educ Prev*. 2004; 16(1):84–100. <https://doi.org/10.1521/aeap.16.1.84.27719> PMID: 15058713.
199. Le TP, Bradshaw BT, Wang MQ, Boekeloo BO. Discomfort in LGBT community and psychological well-being for LGBT Asian Americans: The moderating role of racial/ethnic identity importance. Educational Publishing Foundation; 2022. p. 149–57.
200. Hankivsky O, Christoffersen A. Intersectionality and the determinants of health: a Canadian perspective. *Crit Public Health*. 2008; 18(3):271–83. <https://doi.org/10.1080/09581590802294296>
201. Kalibatseva Z, Leong FT. Depression among Asian Americans: Review and Recommendations. *Depress Res Treat*. 2011; 2011:320902. Epub 20110927. <https://doi.org/10.1155/2011/320902> PMID: 21961060.
202. Kelly C, Kasperavicius D, Duncan D, Etherington C, Giangregorio L, Pesseau J, et al. 'Doing' or 'using' intersectionality? Opportunities and challenges in incorporating intersectionality into knowledge translation theory and practice. *Int Equity Health*. 2021; 20(1):187. <https://doi.org/10.1186/s12939-021-01509-z> PMID: 34419053
203. Rhee S. The Impact of Immigration and Acculturation on the Mental Health of Asian Americans: Overview of Epidemiology and Clinical Implications. In: Trinh N-H, Rho YC, Lu FG, Sanders KM, editors. *Handbook of Mental Health and Acculturation in Asian American Families*. Totowa, NJ: Humana Press; 2009. p. 81–98.
204. Heris CL, Kennedy M, Graham S, Bennetts SK, Atkinson C, Mohamed J, et al. Key features of a trauma-informed public health emergency approach: A rapid review. *Front Public Health*. 2022; 10. <https://doi.org/10.3389/fpubh.2022.1006513> PMID: 36568798



205. Dorado JS, Martinez M, McArthur LE, Leibovitz T. Healthy Environments and Response to Trauma in Schools (HEARTS): A Whole-School, Multi-level, Prevention and Intervention Program for Creating Trauma-Informed, Safe and Supportive Schools. *School Ment Health*. 2016; 8(1):163–76. <https://doi.org/10.1007/s12310-016-9177-0>
206. Goodman RD. A Liberatory Approach to Trauma Counseling: Decolonizing Our Trauma-Informed Practices. In: Goodman RD, Gorski PC, editors. *Decolonizing “Multicultural” Counseling through Social Justice*. New York, NY: Springer New York; 2015. p. 55–72.
207. Dennis E. Exploring the Model Minority: Deconstructing Whiteness Through the Asian American Example. In: Sefa Dei GJ, Hilowle S, editors. *Cartographies of Race and Social Difference*. Cham: Springer International Publishing; 2018. p. 33–48.
208. Liu CZ, Wang E, Nguyen D, Sun MD, Jumreornvong O. The Model Minority Myth, Data Aggregation, and the Role of Medical Schools in Combating Anti-Asian Sentiment. *Acad Med*. 2022; 97(6):797–803. Epub 20220519. <https://doi.org/10.1097/ACM.0000000000004639> PMID: 35703909.
209. Leung JTY. The strengths model: a recovery-oriented approach to mental health services. *China J Soc Work*. 2015; 8(1):84–6. <https://doi.org/10.1080/17525098.2015.1009138>
210. Wu NH, Kim SY. Chinese American adolescents’ perceptions of the language brokering experience as a sense of burden and sense of efficacy. *J Youth Adolesc*. 2009; 38(5):703–18. Epub 20081223. <https://doi.org/10.1007/s10964-008-9379-3> PMID: 19636765.
211. Park M, Chesla CK. Understanding complexity of Asian American family care practices. *Arch Psychiatr Nurs*. 2010; 24(3):189–201. Epub 20091015. <https://doi.org/10.1016/j.apnu.2009.06.005> PMID: 20488345.
212. Ta VM, Holck P, Gee GC. Generational status and family cohesion effects on the receipt of mental health services among Asian Americans: findings from the National Latino and Asian American Study. *Am J Public Health*. 2010; 100(1):115–21. <https://doi.org/10.2105/AJPH.2009.160762> PMID: 19910344.
213. Yi SS, Kwon SC, Suss R, oàn LN, John I, Islam NS, et al. The Mutually Reinforcing Cycle Of Poor Data Quality And Racialized Stereotypes That Shapes Asian American Health. *Health Aff*. 2022; 41(2):296–303. <https://doi.org/10.1377/hlthaff.2021.01417> PMID: 35130076
214. Srinivasan S, Guillermo T. Toward improved health: disaggregating Asian American and Native Hawaiian/Pacific Islander data. *Am J Public Health*. 2000; 90(11):1731–4. <https://doi.org/10.2105/ajph.90.11.1731> PMID: 11076241.
215. Peiris-John R, Wong A, Sobrun-Maharaj A, Ameratunga S. Stakeholder views on factors influencing the wellbeing and health sector engagement of young Asian New Zealanders. *J Prim Health Care*. 2016; 8(1):35–43. <https://doi.org/10.1071/HC15011> PMID: 27477373.
216. Khan A, Khanlou N, Stol J, Tran V. Immigrant and Refugee Youth Mental Health in Canada: A Scoping Review of Empirical Literature. In: Pashang S, Khanlou N, Clarke J, editors. *Today’s Youth and Mental Health: Hope, Power, and Resilience*. Cham: Springer International Publishing; 2018. p. 3–20.
217. Georgiades K, Paksarian D, Rudolph KE, Merikangas KR. Prevalence of Mental Disorder and Service Use by Immigrant Generation and Race/Ethnicity Among U.S. Adolescents. *J Am Acad Child Adolesc Psychiatry* 2018; 57(4):280–7. <https://doi.org/10.1016/j.jaac.2018.01.020> PMID: 29588054
218. Pumariega AJ, Rothe E, Pumariega JB. Mental Health of Immigrants and Refugees. *Community Ment Health J*. 2005; 41(5):581–97. <https://doi.org/10.1007/s10597-005-6363-1> PMID: 16142540
219. Koneru VK, Weisman de Mamani AG, Flynn PM, Betancourt H. Acculturation and mental health: Current findings and recommendations for future research. *Appl Prev Psychol*. 2007; 12(2):76–96. <https://doi.org/10.1016/j.appsy.2007.07.016>
220. Vang C, Sun F, Sangalang CC. Mental health among the Hmong population in the U.S.: A systematic review of the influence of cultural and social factors. *J Soc Work*. 2021; 21(4):811–30. <https://doi.org/10.1177/1468017320940644>
221. Han CS, Oliffe JL, Ogrodniczuk JS. Suicide among East Asians in North America: A scoping review. *J Ment Health*. 2013; 22(4):361–71. <https://doi.org/10.3109/09638237.2012.734651> PMID: 23323847
222. Louie-Poon S, Idrees S, Plesuk T, Hilario C, Scott SD. Racism and the mental health of East Asian diasporas in North America: a scoping review. *J Ment Health*. 1–16. <https://doi.org/10.1080/09638237.2022.2069715> PMID: 35543389
223. Ho IK, Çabuk K. The impact of racial discrimination on the health of Asian Americans during the COVID-19 pandemic: a scoping review. *Ethn Health*. 2023; 28(7):957–82. <https://doi.org/10.1080/13557858.2023.2208312> PMID: 37160688
224. Zou P, Siu A, Wang X, Shao J, Hollowell SG, Yang LL, et al. Influencing Factors of Depression among Adolescent Asians in North America: A Systematic Review. *Healthcare*. 2021; 9(5):537. <https://doi.org/10.3390/healthcare9050537> PMID: 34064345



225. Kim SB, Lee YJ. Factors Associated with Mental Health Help-Seeking Among Asian Americans: a Systematic Review. *J Racial Ethn Health Disparities*. 2022; 9(4):1276–97. <https://doi.org/10.1007/s40615-021-01068-7> PMID: 34076864
226. Wyatt LC, Ung T, Park R, Kwon SC, Trinh-Shevrin C. Risk Factors of Suicide and Depression among Asian American, Native Hawaiian, and Pacific Islander Youth: A Systematic Literature Review. *J Health Care Poor Underserved*. 2015; 26(2 Suppl):191–237. <https://doi.org/10.1353/hpu.2015.0059> PMID: 25981098.
227. Okazaki S, Kassem AM, Tu M-C. Addressing Asian American mental health disparities: Putting community-based research principles to work. *Asian Am J Psychol*. 2014; 5(1):4–12. <https://doi.org/10.1037/a0032675>
228. Chiang A, Simon-Kumar R, Peiris-John R. A decade of Asian and ethnic minority health research in New Zealand: findings from a scoping review. *N Z Med J*. 2021; 134(1542):67–83. Epub 20210917. PMID: 34531585.
229. Ali SH, Mohsin FM, Rouf R, Parekh R, Dhar B, Kaur G, et al. Family Involvement in Asian American Health Interventions: A Scoping Review and Conceptual Model. *Public Health Rep*. 2023; 138(6):885–95. <https://doi.org/10.1177/00333549221138851> PMID: 36560878.
230. Young A, Levitt A, Kodeeswaran S, Markoulakis R. 'Just because we're younger doesn't mean our opinions should be any less valued': A qualitative study of youth perspectives on a Youth Advisory Council in a mental healthcare context. *Health Expect*. 2023. Epub 20230616. <https://doi.org/10.1111/hex.13794> PMID: 37326418.
231. Anderson JE, Lowen CA. Connecting youth with health services: Systematic review. *Can Fam Physician*. 2010; 56(8):778–84. PMID: 20705886.
232. Levac D, Colquhoun H, O'Brien KK. Scoping studies: advancing the methodology. *Implementat Sci*. 2010; 5(1):69. <https://doi.org/10.1186/1748-5908-5-69> PMID: 20854677
233. Brown LD. Exceptionalism as the rule? U.S. health policy innovation and cross-national learning. *J Health Polit Policy Law*. 1998; 23(1):35–51. <https://doi.org/10.1215/03616878-23-1-35> PMID: 9522280.
234. Wong G, Greenhalgh T, Westthorp G, Buckingham J, Pawson R. RAMESES publication standards: meta-narrative reviews. *BMC Med*. 2013; 11(1):20. <https://doi.org/10.1186/1741-7015-11-20> PMID: 23360661
235. Tiwari SK, Wang J. Ethnic differences in mental health service use among White, Chinese, South Asian and South East Asian populations living in Canada. *Soc Psychiatry Psychiatr Epidemiol*. 2008; 43(11):866–71. Epub 20080523. <https://doi.org/10.1007/s00127-008-0373-6> PMID: 18500481.
236. Sue S, Chu JY. The mental health of ethnic minority groups: challenges posed by the Supplement to the Surgeon General's Report on Mental Health. *Cult Med Psychiatry*. 2003; 27(4):447–65. <https://doi.org/10.1023/b:medi.0000005483.80655.15> PMID: 14727680.
237. Sivayoganathan T, Reid GJ. Trends in population characteristics associated with mental health service use among youth and emerging adults in Canada from 2011 to 2016. *Can J Public Health*. 2023; 114(3):464–73. <https://doi.org/10.17269/s41997-022-00734-5> PMID: 36705858
238. Allemang B, Cullen O, Schraeder K, Pintson K, Dimitropoulos G. Recommendations for youth engagement in Canadian mental health research in the context of COVID-19. *J Can Acad Child Adolesc Psychiatry*. 2021; 30(2):123–30. Epub 20210501. PMID: 33953764.
239. Allemang B, Sitter K, Dimitropoulos G. Pragmatism as a paradigm for patient-oriented research. *Health Expect*. 2022; 25(1):38–47. <https://doi.org/10.1111/hex.13384> PMID: 34748689
